# Supplementary material for: Iodine/water-mediated deprotective oxidation of allylic ethers to access α,β-unsaturated ketones and aldehydes
Source: Royal Society of Chemistry journal article supplement (doi:10.1039/d0ra02625e), 2020-01-01

# Supporting Information

## Iodine/water-mediated deprotective oxidation of allylic ethers to access $\alpha,\beta$ -unsaturated ketones and aldehydes

Yuntian Xue,<sup>a</sup> Yaolong Yan,<sup>a</sup> Kezhi Jiang,<sup>a</sup> Weifeng Chen<sup>\*a</sup> and Lei Yang<sup>\*a,b</sup>

<sup>a</sup>Key Laboratory of Organosilicon Chemistry and Material Technology of Ministry of Education, Hangzhou Normal University, Hangzhou 311121, China

<sup>b</sup>Engineering Research Center of High Performance Polymer and Molding Technology, Ministry of Education, College of Chemistry and Molecular Engineering, Qingdao University of Science and Technology, Qingdao 266042, China

Email: lyang@hznu.edu.cn; chenwf@hznu.edu.cn

## Table of Contents

|                                                                         |    |
|-------------------------------------------------------------------------|----|
| 1. General information.....                                             | 3  |
| 2. Optimization Studies.....                                            | 4  |
| 3. General procedure for the synthesis of new substrates <b>1</b> ..... | 6  |
| 4. General procedure for the oxidation of <b>1</b> .....                | 8  |
| 5. Preliminary mechanistic studies.....                                 | 11 |
| 6. References.....                                                      | 15 |
| 7. NMR spectra.....                                                     | 16 |

## 1. General information

Oxygen- and moisture-sensitive reactions were carried out under an argon atmosphere. Solvents were purified and dried by standard methods prior to use. All commercially available reagents were used without further purification, unless otherwise noted. Column chromatography was carried out on silica gel (200-300 mesh). Analytical thin layer chromatography (TLC) was performed using pre-coated silica gel of 60 F254 (0.25 mm) plates and was visualized by UV (254 nm) and/or permanganate stain.

High resolution mass spectra (HRMS) were recorded on a Bruker microQTOF-QII. NMR spectra were recorded with TMS as an internal standard on a Bruker AV-400 MHz instrument (400 MHz for  $^1\text{H}$  NMR, 101 MHz for  $^{13}\text{C}$  NMR). Chemical shifts were reported in ppm on the  $\delta$  scale relative to  $\text{CDCl}_3$  ( $\delta = 7.26$  for  $^1\text{H}$  NMR,  $\delta = 77.2$  for  $^{13}\text{C}$  NMR). Multiplicities are indicated as: s (singlet), d (doublet), t (triplet), dd (doublet of doublet), or m (multiplet). Coupling constants (J) are reported in Hertz (Hz). GC-MS analyses were performed with Agilent 5977A/7890B GC-MS system. Most of allyl benzyl ethers<sup>1,2</sup>, allyl silyl ethers<sup>3</sup>, allyl esters<sup>4</sup> were known and prepared according to the previous reports.

## 2. Optimization studies

Table S1 Screening of solvents<sup>a</sup>

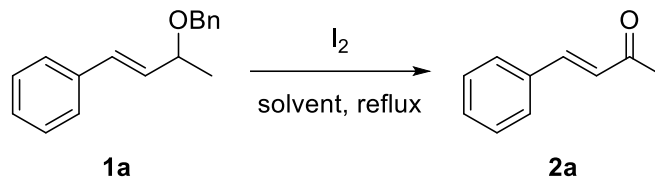

| Entry | Temperature (°C) | Solvent (ratio)                    | Yield (%) <sup>b</sup> |
|-------|------------------|------------------------------------|------------------------|
| 1     | 115              | 1,4-Dioxane/H <sub>2</sub> O (5:1) | 78                     |
| 2     | 115              | 1,4-Dioxane                        | 0                      |
| 3     | 105              | H <sub>2</sub> O                   | 35                     |
| 4     | 90               | Toluene/H <sub>2</sub> O (5:1)     | 18                     |
| 5     | 70               | THF/H <sub>2</sub> O (5:1)         | 40                     |
| 6     | 82               | MeOH/H <sub>2</sub> O (5:1)        | 15                     |
| 7     | 150              | DMF/H <sub>2</sub> O (5:1)         | 26                     |
| 8     | 150              | DMSO/H <sub>2</sub> O (5:1)        | 51                     |
| 9     | 60               | DCM/H <sub>2</sub> O (5:1)         | 12                     |

<sup>a</sup> General conditions: **1a** (0.1 mmol), I<sub>2</sub> (0.16 mmol, 1.6 eq.), solvent (3.6 mL, solvent ratios are by volume), at refluxing temperature (60-150 °C), 2 h, under air. <sup>b</sup> Isolated yields.

Table S2 Screening of other conditions<sup>a</sup>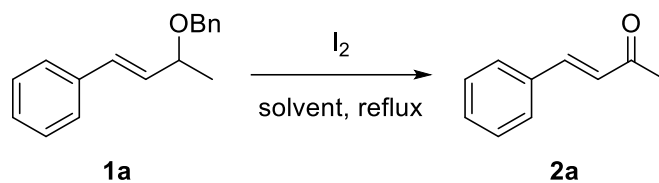

| Entry          | I <sub>2</sub> | Temperature (°C) | Solvent (ratio)                     | Time (h) | Yield (%) <sup>b</sup> |
|----------------|----------------|------------------|-------------------------------------|----------|------------------------|
| 1              | 1.6eq          | 25               | 1,4-Dioxane/H <sub>2</sub> O (5:1)  | 2        | 0                      |
| 2 <sup>c</sup> | 1.6eq          | 115              | 1,4-Dioxane/H <sub>2</sub> O (5:1)  | 2        | 63                     |
| 3              | 1.6eq          | 115              | 1,4-Dioxane/H <sub>2</sub> O (5:1)  | 24       | 91                     |
| 4              | 0.5eq          | 115              | 1,4-Dioxane/H <sub>2</sub> O (5:1)  | 24       | 72                     |
| 5              | 2.0eq          | 115              | 1,4-Dioxane/H <sub>2</sub> O (5:1)  | 24       | 79                     |
| 6              | 0eq            | 115              | 1,4-Dioxane/H <sub>2</sub> O (5:1)  | 24       | 0                      |
| 7              | 1.6eq          | 115              | 1,4-Dioxane/H <sub>2</sub> O (1:1)  | 24       | 63                     |
| 8              | 1.6eq          | 115              | 1,4-Dioxane/H <sub>2</sub> O (2:1)  | 24       | 72                     |
| 9              | 1.6eq          | 115              | 1,4-Dioxane/H <sub>2</sub> O (10:1) | 24       | 90                     |

<sup>a</sup> General conditions: **1a** (0.1 mmol), I<sub>2</sub> (0-2.0 eq.), solvent (3.6 mL, solvent ratios are by volume), at 25 or 115°C, 2 or 24 h, under air. <sup>b</sup> Isolated yields. <sup>c</sup> Under Ar.

### 3. General procedure for the synthesis of new substrates 1

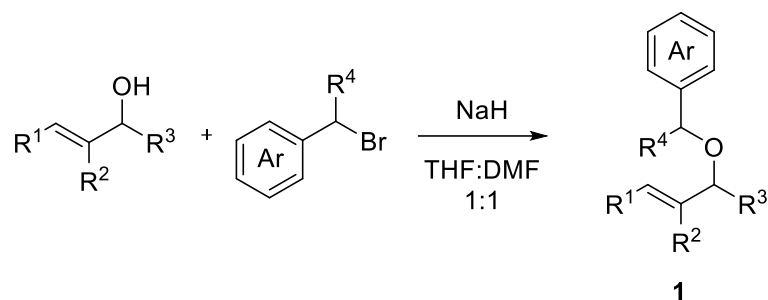

To a solution of the corresponding allyl alcohol (3.0 mmol, 1.0 eq.) in anhydrous THF (10 mL) and DMF (10 mL) was added NaH (6.0 mmol, 2.0 eq.) and benzyl bromide (6.0 mmol, 2.0 eq.) at 0 °C under Ar. The reaction mixture was allowed to stir at room temperature for 5 h and then quenched with H<sub>2</sub>O (10 mL). The aqueous layer was extracted with EtOAc (5 mL × 3) and the organic layer was washed with H<sub>2</sub>O and brine, dried over anhydrous MgSO<sub>4</sub> and evaporated in vacuo. The crude residue was purified by column chromatography (EtOAc/hexane = 1/30) to afford **1** as colorless or yellow oil.

#### (*E*)-1-(3-(benzyloxy)but-1-en-1-yl)-2-methoxybenzene (**1h**)

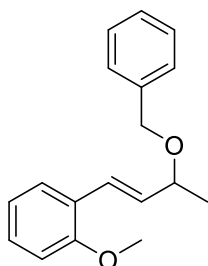

*General procedure* was followed on 534.7 mg (*E*)-4-(2-methoxyphenyl)but-3-en-2-ol to afford 732.0 mg colorless oil, yield 91%.

**<sup>1</sup>H NMR** (400 MHz, CDCl<sub>3</sub>) δ 7.40 (dd, *J* = 7.6, 1.6 Hz, 1H), 7.30 – 7.24 (m, 4H), 7.20 – 7.13 (m, 2H), 6.87 – 6.81 (m, 2H), 6.79-7.78 (m, 1H), 6.09 (dd, *J* = 16.1, 8.0 Hz, 1H), 4.54 (d, *J* = 12.0 Hz, 1H), 4.36 (d, *J* = 12.0 Hz, 1H), 4.07 – 4.00 (m, 1H), 3.77 (s, 3H), 1.31 (d, *J* = 6.4 Hz, 3H).

Chemical Formula: C<sub>18</sub>H<sub>20</sub>O<sub>2</sub>  
Exact Mass: 268.1463

**<sup>13</sup>C NMR** (101 MHz, CDCl<sub>3</sub>) δ 156.7, 138.9, 132.1, 128.8, 128.4, 127.8, 127.4, 126.9, 126.4, 125.6, 120.7, 110.9, 76.5, 69.9, 55.5, 21.9.

**HRMS** (ESI) calcd. for C<sub>18</sub>H<sub>20</sub>O<sub>2</sub>Na [M+Na<sup>+</sup>]: 291.1356, found: 291.1369.

#### (*E*)-1-(3-(benzyloxy)but-1-en-1-yl)-3-methoxybenzene (**1i**)

*General procedure* was followed on 534.7 mg (*E*)-4-(3-methoxyphenyl)but-3-en-2-ol to afford 732.0 mg colorless oil, yield 91%.

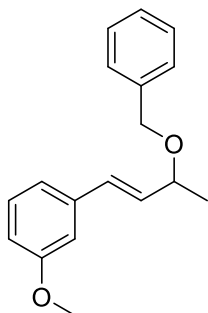

Chemical Formula: C<sub>18</sub>H<sub>20</sub>O<sub>2</sub>  
Exact Mass: 268.1463

**<sup>1</sup>H NMR** (400 MHz, CDCl<sub>3</sub>) δ 7.28 – 7.24 (m, 4H), 7.21 – 7.18 (m, 1H), 7.16 – 7.14 (m, 1H), 6.92 (d, *J* = 7.6 Hz, 1H), 6.87 – 6.85 (m, 1H), 6.74 – 6.72 (m, 1H), 6.43 (d, *J* = 15.9 Hz, 1H), 6.08 (dd, *J* = 15.9, 7.7 Hz, 1H), 4.53 (d, *J* = 12.0 Hz, 1H), 4.36 (d, *J* = 12.0 Hz, 1H), 4.04–4.00 (m, 1H), 3.74 (s, 3H), 1.30 (d, *J* = 6.4 Hz, 3H).

**<sup>13</sup>C NMR** (101 MHz, CDCl<sub>3</sub>) δ 159.9, 138.8, 138.1, 132.0, 131.4, 129.6, 128.4, 127.7, 127.5, 119.2, 113.5, 111.7, 75.8, 70.1, 55.3, 21.8.

**HRMS** (ESI) calcd. for C<sub>18</sub>H<sub>20</sub>O<sub>2</sub>Na [M+Na<sup>+</sup>]: 291.1356,

found: 291.1369.

#### (*E*)-2-(3-(benzyloxy)but-1-en-1-yl)thiophene (1k)

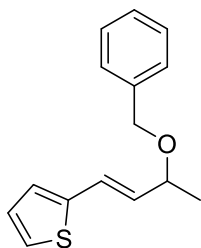

Chemical Formula: C<sub>15</sub>H<sub>16</sub>OS  
Exact Mass: 244.0922

*General procedure* was followed on 462.6 mg (*E*)-4-(thiophen-2-yl)but-3-en-2-ol to afford 527.2 mg colorless oil, yield 72%.

**<sup>1</sup>H NMR** (400 MHz, CDCl<sub>3</sub>) δ 7.35 – 7.27 (m, 5H), 7.17 – 7.16 (m, 1H), 6.97 (d, *J* = 3.4 Hz, 2H), 6.67 (d, *J* = 15.8 Hz, 1H), 6.00 (dd, *J* = 15.8, 7.6 Hz, 1H), 4.62 (d, *J* = 12.0 Hz, 1H), 4.43 (d, *J* = 12.0 Hz, 1H), 4.07 – 4.04 (m, 1H), 1.36 (d, *J* = 6.4 Hz, 3H).

**<sup>13</sup>C NMR** (101 MHz, CDCl<sub>3</sub>) δ 141.8, 138.7, 131.3, 128.4, 127.7, 127.5, 127.4, 125.8, 124.5, 124.4, 75.5, 70.1, 21.7.

**HRMS** (ESI) calcd. for C<sub>15</sub>H<sub>16</sub>OSNa [M+Na<sup>+</sup>]: 267.0814, found: 267.0806.

#### ((3-benzylidenepentane-2,4-diyl)bis(oxy))bis(methylene)dibenzene (1l)

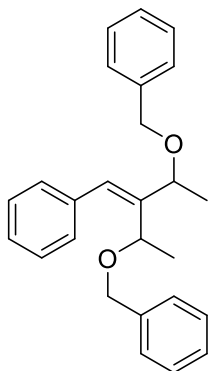

Chemical Formula: C<sub>26</sub>H<sub>28</sub>O<sub>2</sub>  
Exact Mass: 372.2089

*General procedure* was followed on 576.7 mg 3-benzylidenepentane-2,4-diol to afford 993.7 mg colorless oil, yield 89%.

**<sup>1</sup>H NMR** (400 MHz, CDCl<sub>3</sub>) δ 7.29 – 7.22 (m, 6H), 7.20 – 7.16 (m, 2H), 7.14 – 7.11 (m, 5H), 7.04 – 7.02 (m, 1H), 6.99 – 6.97 (m, 1H), 6.95 (d, *J* = 4.7 Hz, 1H), 4.58 – 4.48 (m, 2H), 4.39 – 4.28 (m, 3H), 4.06 (dd, *J* = 11.8, 9.2 Hz, 1H), 1.40 (dd, *J* = 17.3, 6.3 Hz, 3H), 1.31 (dd, *J* = 19.8, 6.7 Hz, 3H).

**<sup>13</sup>C NMR** (101 MHz, CDCl<sub>3</sub>) δ 144.6, 144.4, 139.0, 138.8, 138.5, 138.4, 137.0, 136.9, 129.1, 128.8, 128.4, 128.4, 128.3, 128.2, 128.2, 128.1, 127.7, 127.7, 127.6, 127.5, 127.4, 127.4, 127.3, 126.8, 126.8, 73.3, 72.7, 71.6, 71.1, 70.4, 70.3, 70.2, 70.1, 24.4, 23.6, 20.6, 20.1.

**HRMS** (ESI) calcd. for C<sub>26</sub>H<sub>28</sub>O<sub>2</sub>Na [M+Na<sup>+</sup>]: 395.1982, found: 395.1995.

## 4. General procedure for the oxidation of **1**

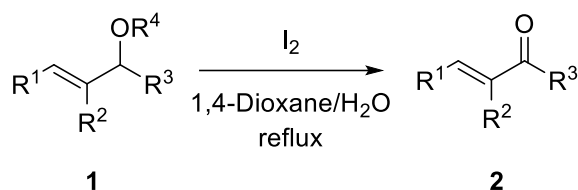

To a solution of **1** (0.1 mmol, 1.0 eq.) in 1,4-dioxane (3.0 mL) and water (0.6 mL) was added I<sub>2</sub> (40.6 mg, 0.16 mmol, 1.6 eq.). The mixture was refluxed for 24 h, then cooled to room temperature. The reaction was quenched with aq. Na<sub>2</sub>S<sub>2</sub>O<sub>3</sub> and extracted with EtOAc (5 mL × 3). The combined organic layer was washed with H<sub>2</sub>O and brine, dried over anhydrous MgSO<sub>4</sub> and concentrated in vacuo. The crude residue was purified by column chromatography (EtOAc/hexane = 1:50 – 1:20) to afford **2**.

### (*E*)-4-phenylbut-3-en-2-one (**2a**)

General procedures was followed on **1t** (26.2 mg) to afford **2a** as colorless oil (13.9 mg, yield 95%).

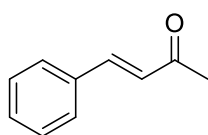

Chemical Formula: C<sub>10</sub>H<sub>10</sub>O  
Exact Mass: 146.0732

<sup>1</sup>H NMR (400 MHz, CDCl<sub>3</sub>) δ 7.48 – 7.42 (m, 3H), 7.33 – 7.31 (m, 3H), 6.64 (d, *J* = 16.3 Hz, 1H), 2.31 (s, 3H);  
<sup>13</sup>C NMR (101 MHz, CDCl<sub>3</sub>) δ 198.5, 143.5, 134.2, 130.5, 129.0, 128.2, 127.1, 27.5.

### (*E*)-4-(*p*-tolyl)but-3-en-2-one (**2f**)

General procedures was followed on **1f** (25.2 mg) to afford **2f** as colorless oil (14.7 mg, yield 92%).

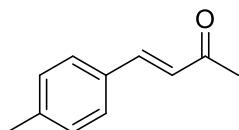

Chemical Formula: C<sub>11</sub>H<sub>12</sub>O  
Exact Mass: 160.2160

<sup>1</sup>H NMR (400 MHz, CDCl<sub>3</sub>) δ 7.39 (m, 3H), 7.12 (d, *J* = 7.9 Hz, 2H), 6.60 (d, *J* = 16.3 Hz, 1H), 2.29 (d, *J* = 1.7 Hz, 6H);  
<sup>13</sup>C NMR (101 MHz, CDCl<sub>3</sub>) δ 198.6, 143.6, 141.0, 131.6, 129.7,

128.2, 126.2, 27.4, 21.5.

### (*E*)-4-(4-bromophenyl)but-3-en-2-one (**2g**)

General procedures was followed on **1g** (31.7 mg) to afford **2g** as colorless oil (20.5 mg, yield 91%).

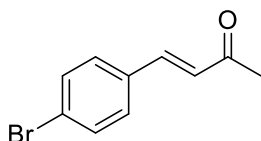

Chemical Formula: C<sub>10</sub>H<sub>9</sub>BrO  
Exact Mass: 223.9837

<sup>1</sup>H NMR (400 MHz, CDCl<sub>3</sub>) δ 7.45 (d, *J* = 8.4 Hz, 2H), 7.38 – 7.31 (m, 3H), 6.62 (d, *J* = 16.3 Hz, 1H), 2.30 (s, 3H);  
<sup>13</sup>C NMR (101 MHz, CDCl<sub>3</sub>) δ 198.1, 141.9, 133.3, 132.2, 129.6,

127.5, 124.8, 27.7.



**(E)-4-(2-methoxyphenyl)but-3-en-2-one (2h)**

General procedures was followed on **1h** (26.8 mg) to afford **2h** as colorless oil (15.5 mg, yield 88%).

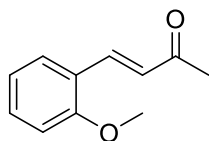

Chemical Formula: C<sub>11</sub>H<sub>12</sub>O<sub>2</sub>  
Exact Mass: 176.0837

<sup>1</sup>H NMR (400 MHz, CDCl<sub>3</sub>) δ 7.88 (d, *J* = 16.5 Hz, 1 H), 7.53 (dd, *J* = 7.7, 1.5 Hz, 1H), 7.38 – 7.34 (m, 1H), 6.98 – 6.90 (m, 2H), 6.74 (d, *J* = 16.5 Hz, 1H), 3.88 (s, 3H), 2.38 (s, 3H);  
<sup>13</sup>C NMR (101 MHz, CDCl<sub>3</sub>) δ 199.2, 158.3, 138.8, 131.8, 128.3, 127.7, 123.3, 120.8, 111.2, 55.5, 27.2.

**(E)-4-(3-methoxyphenyl)but-3-en-2-one (2i)**

General procedures was followed on **1i** (26.8 mg) to afford **2i** as colorless oil (15.6 mg, yield 89%).

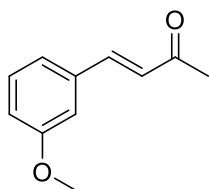

Chemical Formula: C<sub>11</sub>H<sub>12</sub>O<sub>2</sub>  
Exact Mass: 176.0837

<sup>1</sup>H NMR (400 MHz, CDCl<sub>3</sub>) δ 7.47 (d, *J* = 16.3 Hz, 1H), 7.30 (dd, *J* = 14.7, 6.8 Hz, 1H), 7.13 (d, *J* = 7.7 Hz, 1H), 7.06 – 7.05 (m, 1H), 6.96 – 6.93 (m, 1H), 6.69 (d, *J* = 16.3 Hz, 1H), 3.82 (s, 3H), 2.37 (s, 3H);  
<sup>13</sup>C NMR (101 MHz, CDCl<sub>3</sub>) δ 198.5, 159.9, 143.4, 135.8, 130.0, 127.4, 121.0, 116.4, 113.0, 55.3, 27.5.

**(E)-4-(4-methoxyphenyl)but-3-en-2-one (2j)**

General procedures was followed on **1j** (26.8 mg) to afford **2j** as colorless oil (15.8 mg, yield 90%).

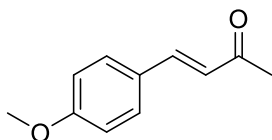

Chemical Formula: C<sub>11</sub>H<sub>12</sub>O<sub>2</sub>  
Exact Mass: 176.0837

<sup>1</sup>H NMR (400 MHz, CDCl<sub>3</sub>) δ 7.50 – 7.45 (m, 3H), 6.91 (d, *J* = 8.7 Hz, 2H), 6.61 (d, *J* = 16.2 Hz, 1H), 3.84 (s, 3H), 2.36 (s, 3H);  
<sup>13</sup>C NMR (101 MHz, CDCl<sub>3</sub>) δ 203.4, 198.3, 163.6, 161.6, 143.2, 129.9, 127.0, 125.0, 114.4, 55.3, 27.4.

**(E)-4-(thiophen-2-yl)but-3-en-2-one (2k)**

General procedures was followed on **1k** (24.4 mg) to afford **2k** as colorless oil (7.7 mg, yield 51%).

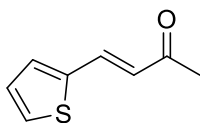

Chemical Formula: C<sub>8</sub>H<sub>8</sub>OS  
Exact Mass: 152.0296

<sup>1</sup>H NMR (400 MHz, CDCl<sub>3</sub>) δ 7.63 (d, *J* = 15.9 Hz, 1H), 7.40 (d, *J* = 5.1 Hz, 1H), 7.29 (d, *J* = 3.6 Hz, 1H), 7.06 (dd, *J* = 5.1, 3.7 Hz, 1H), 6.52 (d, *J* = 15.9 Hz, 1H), 2.33 (s, 3H);  
<sup>13</sup>C NMR (101 MHz, CDCl<sub>3</sub>) δ 197.8, 139.7, 135.8, 131.6, 128.9, 128.3, 125.8, 27.6.

### 3-benzylidenepentane-2,4-dione (**2l**)

General procedures was followed on **1l** (37.2 mg) to afford **2l** as colorless oil (16.7 mg, yield 89%).

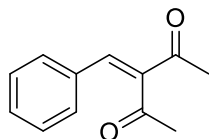

Chemical Formula: C<sub>12</sub>H<sub>12</sub>O<sub>2</sub>  
Exact Mass: 188.0837

<sup>1</sup>H NMR (400 MHz, CDCl<sub>3</sub>) δ 7.49 (s, 1H), 7.42 – 7.39 (m, 5H), 2.43 (s, 3H), 2.29 (s, 3H);

<sup>13</sup>C NMR (101 MHz, CDCl<sub>3</sub>) δ 205.6, 196.5, 142.8, 139.8, 132.9, 130.7, 129.7, 129.1, 31.7, 26.5.

### Cinnamaldehyde (**2m**)

General procedures was followed on **1m** (22.4 mg) to afford **2m** as colorless oil (12.1 mg, yield 92%).

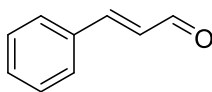

Chemical Formula: C<sub>9</sub>H<sub>8</sub>O  
Exact Mass: 132.0575

<sup>1</sup>H NMR (400 MHz, CDCl<sub>3</sub>) δ 9.70 (d, *J* = 7.7 Hz, 1H), 7.57 – 7.55 (m, 2H), 7.49 – 7.42 (m, 4H), 6.72 (dd, *J* = 15.9, 7.7 Hz, 1H); <sup>13</sup>C

NMR (101 MHz, CDCl<sub>3</sub>) δ 193.7, 152.8, 134.0, 131.3, 129.1, 128.6, 128.5.

### (*E*)-chalcone (**2p**)

General procedures was followed on **1q** (30.0 mg) to afford **2p** as colorless oil (18.5 mg, yield 89%).

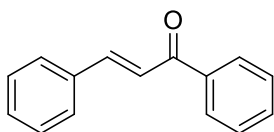

Chemical Formula: C<sub>15</sub>H<sub>12</sub>O  
Exact Mass: 208.0888

<sup>1</sup>H NMR (400 MHz, CDCl<sub>3</sub>) δ 7.96 – 7.94 (m, 2H), 7.74 (d, *J* = 15.7 Hz, 1H), 7.58 – 7.56 (m, 2H), 7.53 – 7.48 (m, 2H), 7.45 – 7.41 (m, 2H), 7.35 – 7.34 (m, 3H);

<sup>13</sup>C NMR (101 MHz, CDCl<sub>3</sub>) δ 190.6, 144.9, 138.3, 134.9, 132.8, 130.6, 129.0, 128.6, 128.5, 128.5, 122.1.

### Methacrylaldehyde (**2r**)

General procedures was followed on **1r** (16.2 mg) to afford **2r** as yellow oil (6.37 mg, yield 91%).

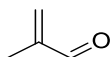

Chemical Formula: C<sub>4</sub>H<sub>6</sub>O  
Exact Mass: 70.0419

<sup>1</sup>H NMR (400 MHz, CDCl<sub>3</sub>) δ 9.56 (s, 1H), 6.31 – 6.30 (m, 1H), 6.00 (s, 1H), 1.85 – 1.84 (m, 3H);

<sup>13</sup>C NMR (101 MHz, CDCl<sub>3</sub>) δ 194.8, 145.9, 134.5, 13.9.

### (*E*)-4-(2,6,6-trimethylcyclohex-1-en-1-yl)but-3-en-2-one (**2s**)

General procedures was followed on **1s** (28.4 mg) to afford **2s** as colorless oil (16.7 mg, yield 87%).

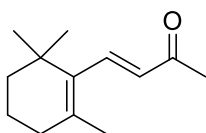

Chemical Formula: C<sub>13</sub>H<sub>20</sub>O  
Exact Mass: 192.1514

<sup>1</sup>H NMR (400 MHz, CDCl<sub>3</sub>) δ 7.28 (d, *J* = 17.6 Hz, 1H), 6.12 (d, *J* = 16.4 Hz, 1H), 2.30 (d, *J* = 1.2 Hz, 3H), 2.07 (t, *J* = 6.1 Hz, 2H), 1.76 (s, 3H), 1.64 – 1.60 (m, 2H), 1.48 (dd, *J* = 5.8, 3.1 Hz, 2H), 1.07 (d, *J* = 1.0 Hz, 6H);

<sup>13</sup>C NMR (101 MHz, CDCl<sub>3</sub>) δ 198.7, 143.1, 136.0, 135.9, 131.6, 39.7, 34.0, 33.5, 28.8, 27.1, 21.7, 18.8.

## 5. Preliminary mechanistic studies

### <sup>18</sup>O-labeling experiment

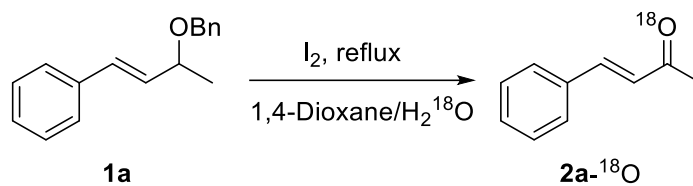

To a reaction tube was added I<sub>2</sub> (51.0 mg, 0.2 mmol, 1.6 eq.), **1a** (30.0 mg, 0.13 mmol, 1.0 eq.), 1,4-dioxane (3.0 mL) and H<sub>2</sub><sup>18</sup>O (0.6 mL). The mixture was refluxed for 24 h, then cooled to room temperature. The reaction was quenched with aq. Na<sub>2</sub>S<sub>2</sub>O<sub>3</sub> and extracted with EtOAc (5 mL × 3). The organic layer was washed with H<sub>2</sub>O and brine, dried over anhydrous MgSO<sub>4</sub> and concentrated in vacuo. The crude residue was purified by column chromatography (EtOAc/hexane = 1:30) to afford **2a-<sup>18</sup>O**, which was determined by NMR and GC-MS, as a colorless oil (17.4 mg, 92% yield).

<sup>1</sup>H NMR (400 MHz, CDCl<sub>3</sub>) δ 7.49 – 7.32 (m, 6H), 6.65 (d, *J* = 16.2 Hz, 1H), 2.32 (s, 3H).

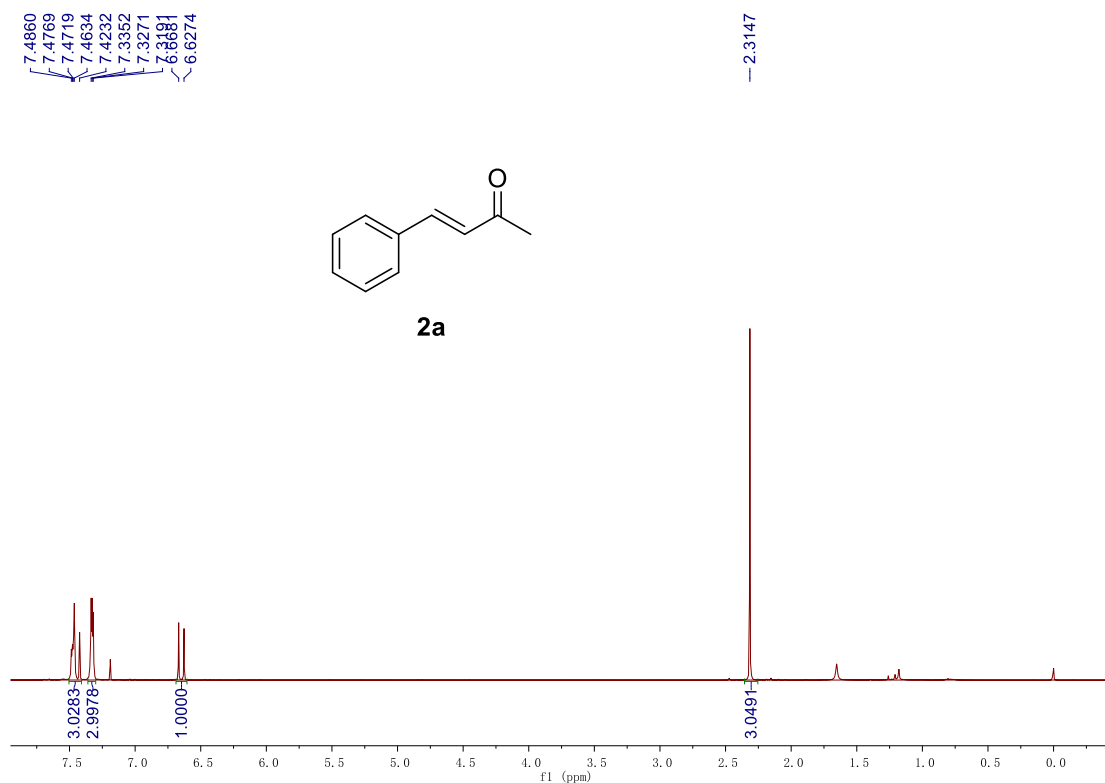

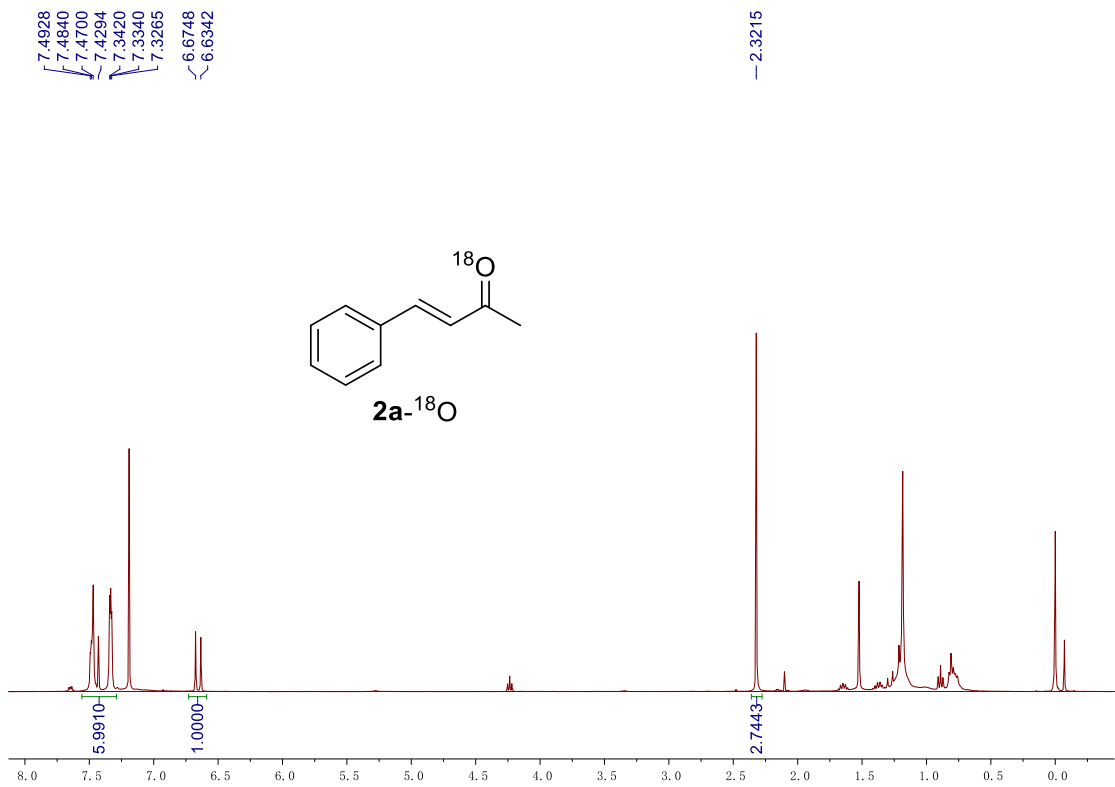

### GC-MS plot of 2a

丰度

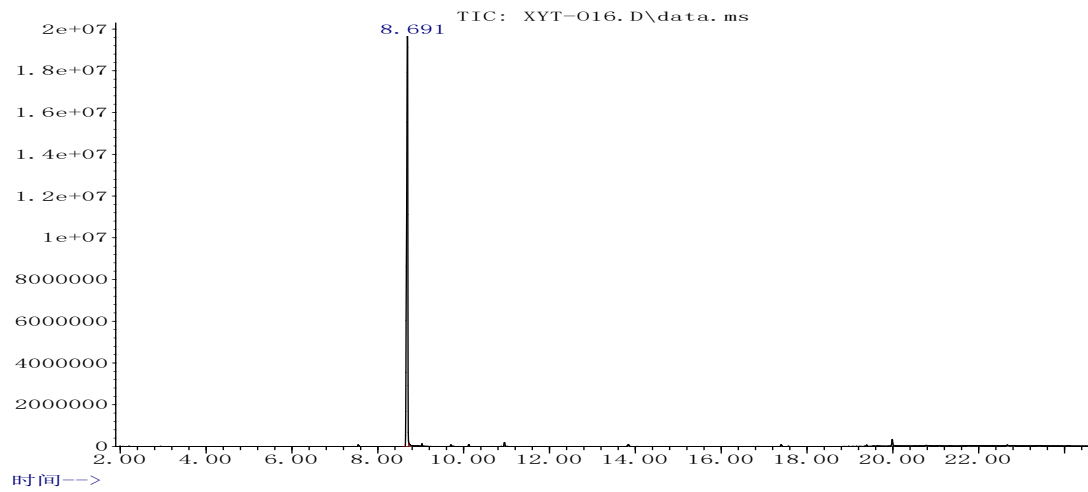

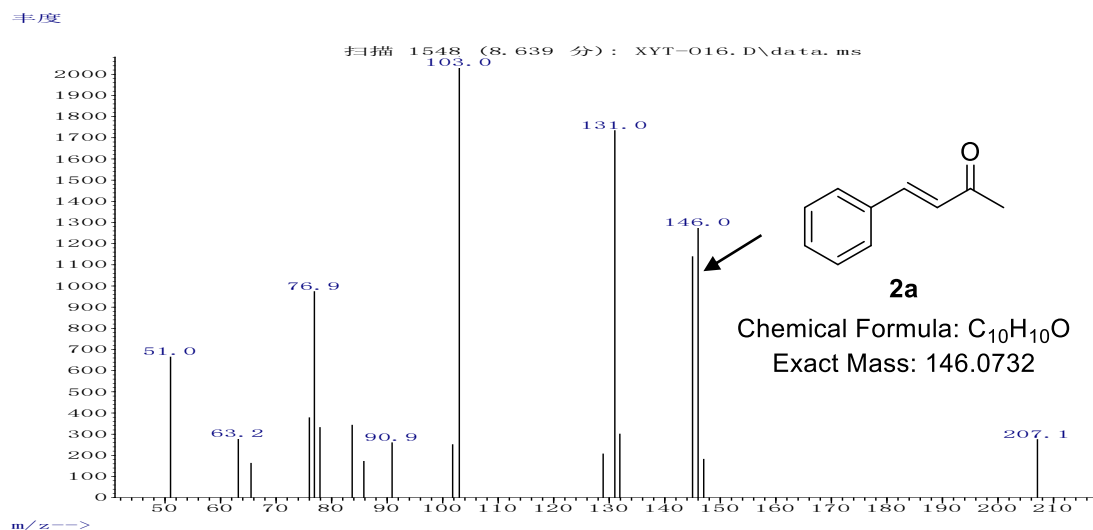

### GC-MS plot of $2a-^{18}O$

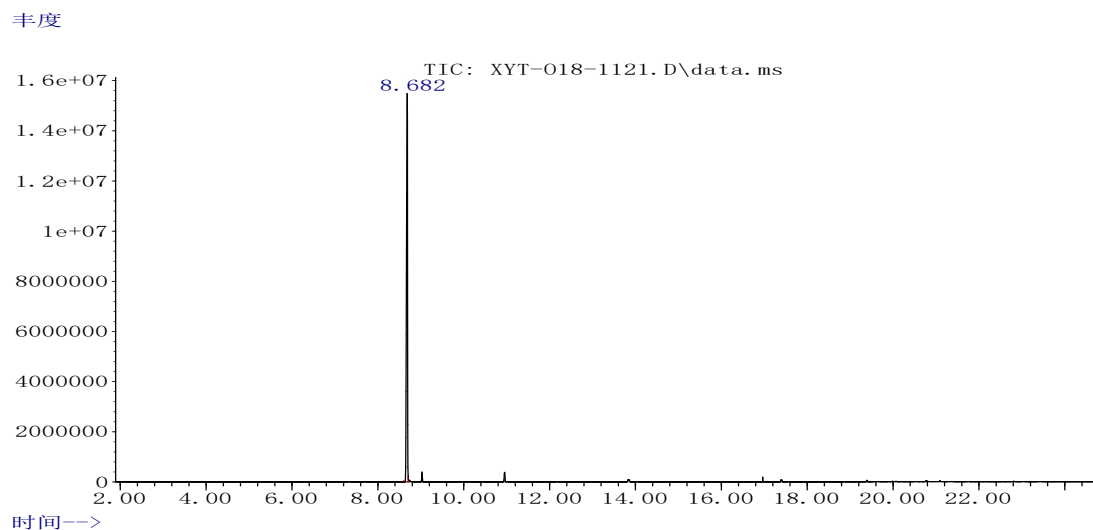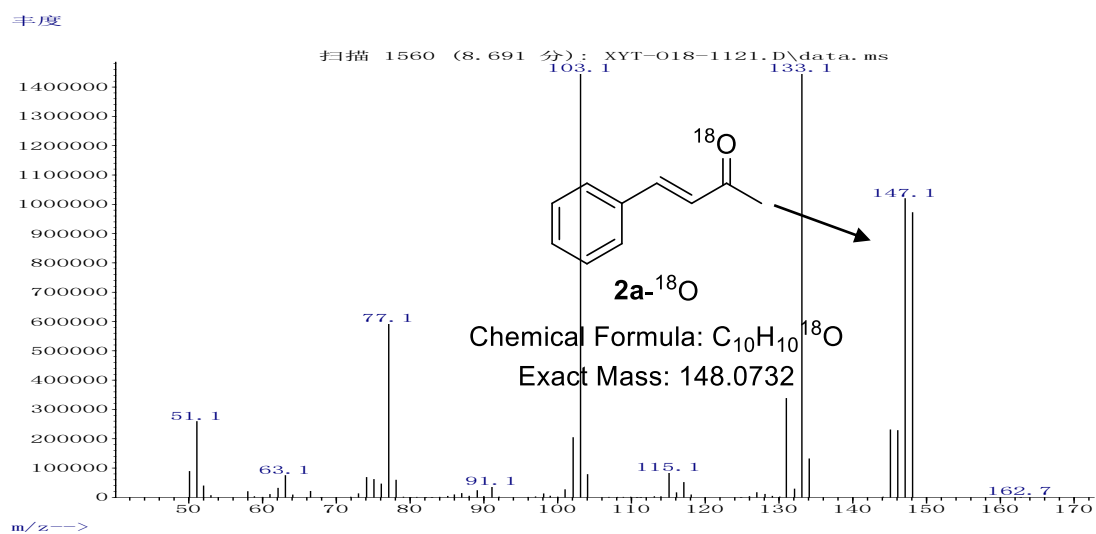

### The oxidation of allylic alcohol **3**

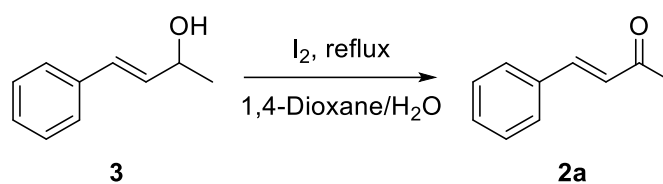

To a reaction tube was added  $I_2$  (40.6 mg, 0.16 mmol, 1.6 eq.), **3** (14.8 mg, 0.1 mmol, 1.0 eq.), 1,4-dioxane (2.0 mL) and  $H_2O$  (0.4 mL). The mixture was refluxed for 24 h, then cooled to room temperature. The reaction was quenched with aq.  $Na_2S_2O_3$  and extracted with EtOAc (5 mL  $\times$  3). The organic layer was washed with  $H_2O$  and brine, dried over  $MgSO_4$  and concentrated in vacuo. The residue was purified by column chromatography (EtOAc/hexane = 1:30) to afford **2a** (12.3 mg, 84% yield) as colorless oil.

$^1H$  NMR (400 MHz,  $CDCl_3$ )  $\delta$  7.48 – 7.42 (m, 3H), 7.34 – 7.32 (m, 3H), 6.65 (d,  $J$  = 16.3 Hz, 1H), 2.32 (s, 3H).

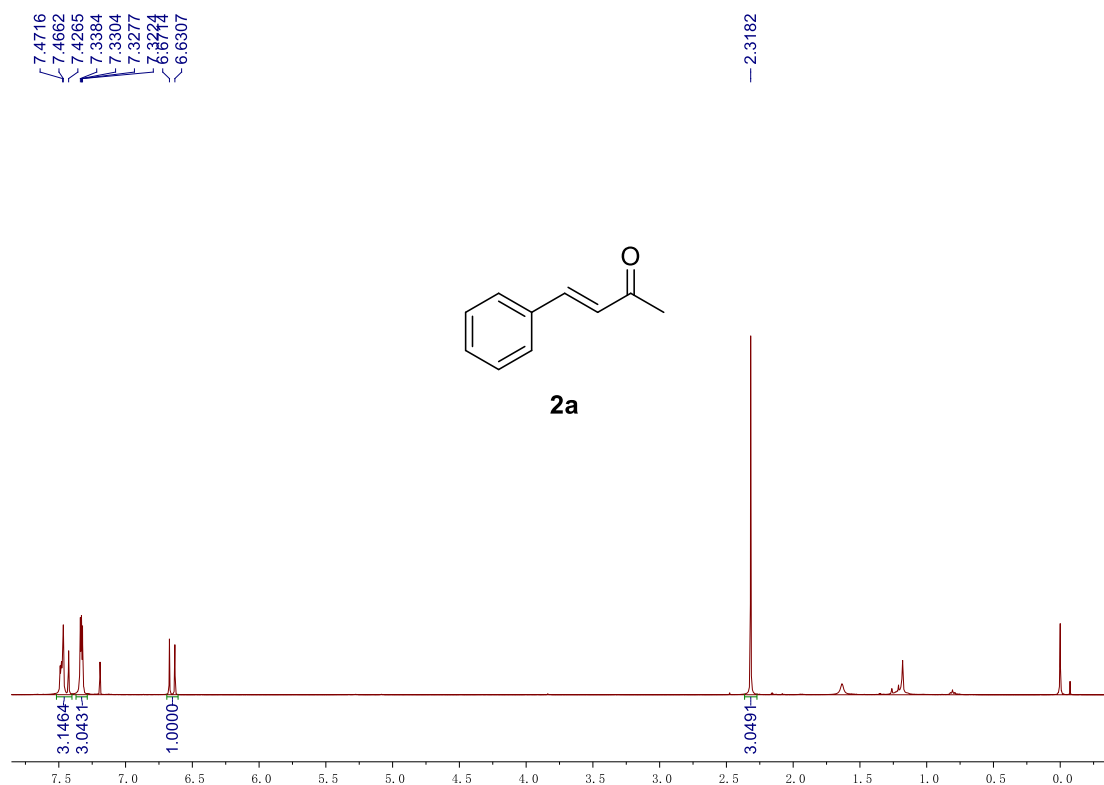

## 6. References

- 1 W. Gładkowski, A. Skrobiszewski, M. Mazur, M. Siepka, A. Pawlak, B. Obminska-Mrukowicz, A. Bialonska, D. Poradowski, A. Drynda, M. Urbaniak, *Tetrahedron*, 2013, **69**, 10414-10423.
- 2 J. Waser, B. Gaspar, H. Nambu, E. M. Carreira, *J. Am. Chem. Soc.*, 2006, **128**, 11693-11712.
- 3 A. B. Charette, M.-C. Lacasse, *Org Lett.*, 2002, **4**, 3351-3353.
- 4 F. Chen, Y. Zhang, L. Yu, S. Zhu, *Angew. Chem., Int., Ed.*, 2017, **56**, 2022-2025.

## 7. NMR spectra

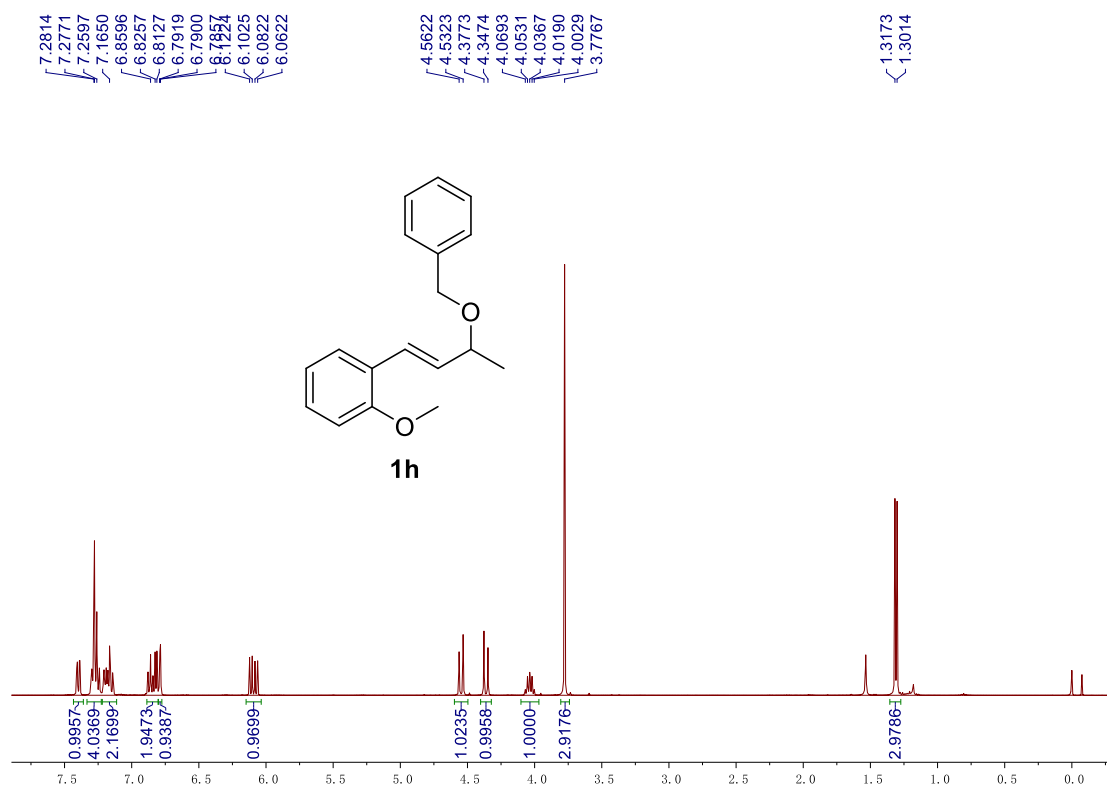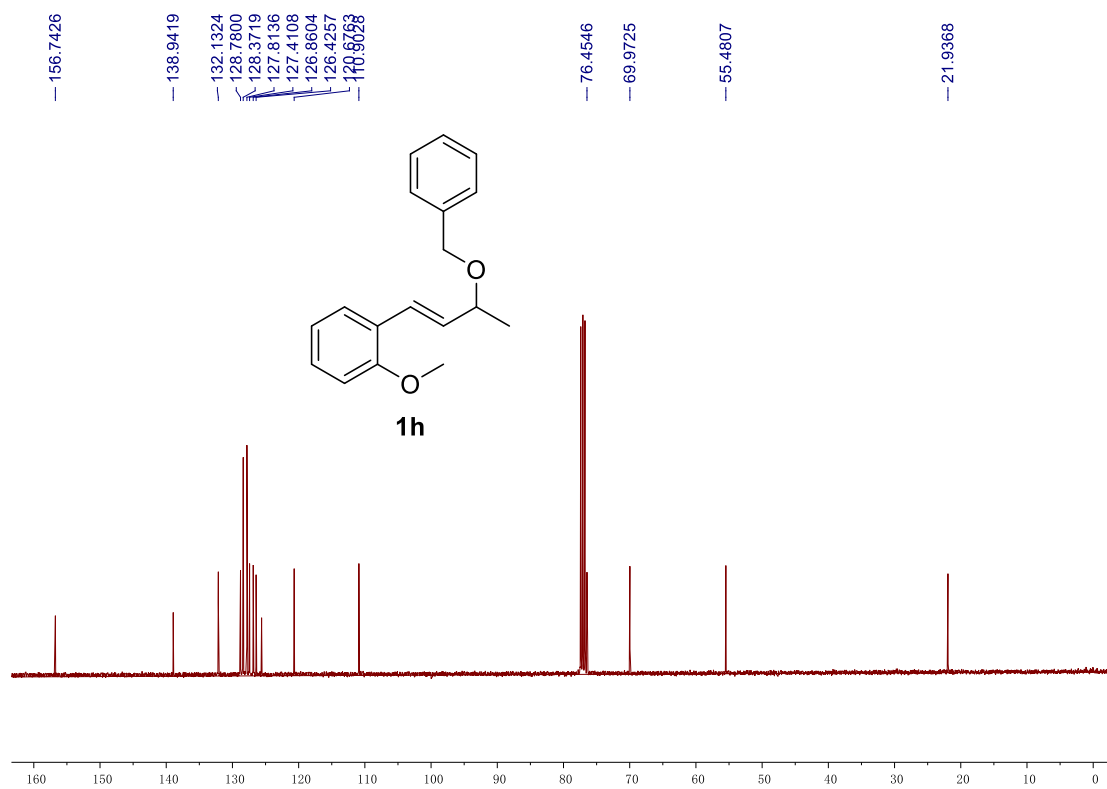



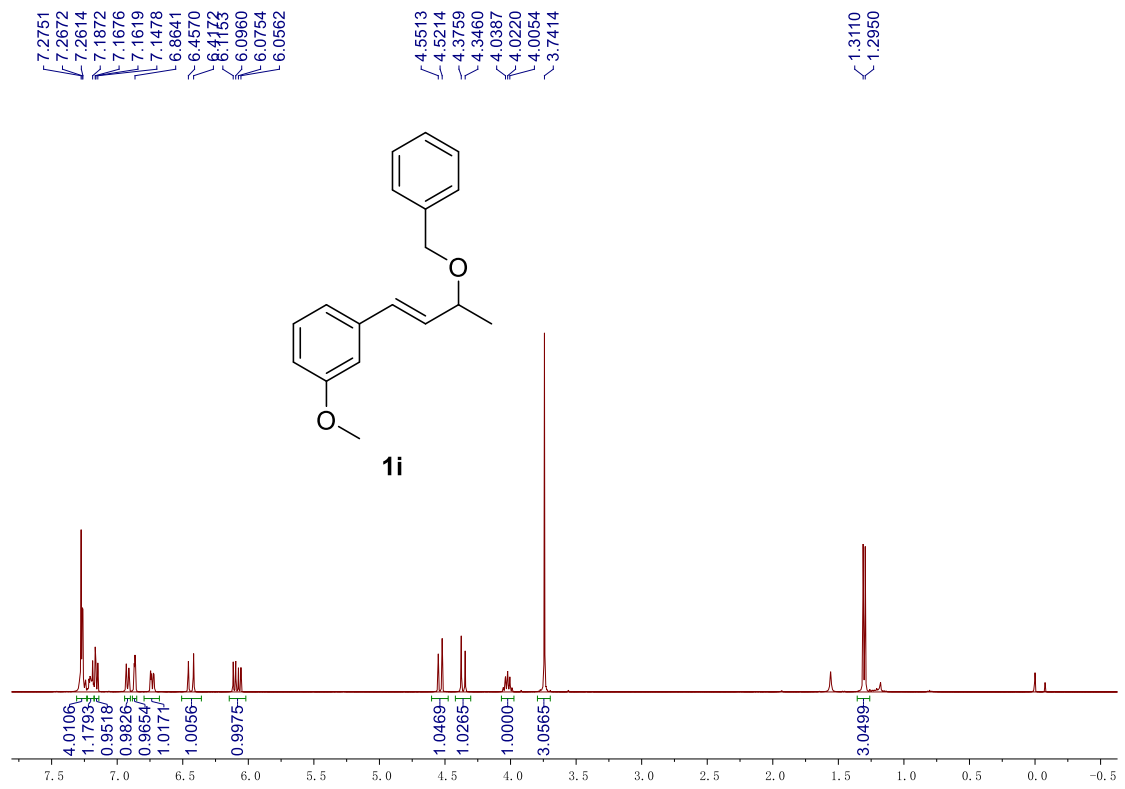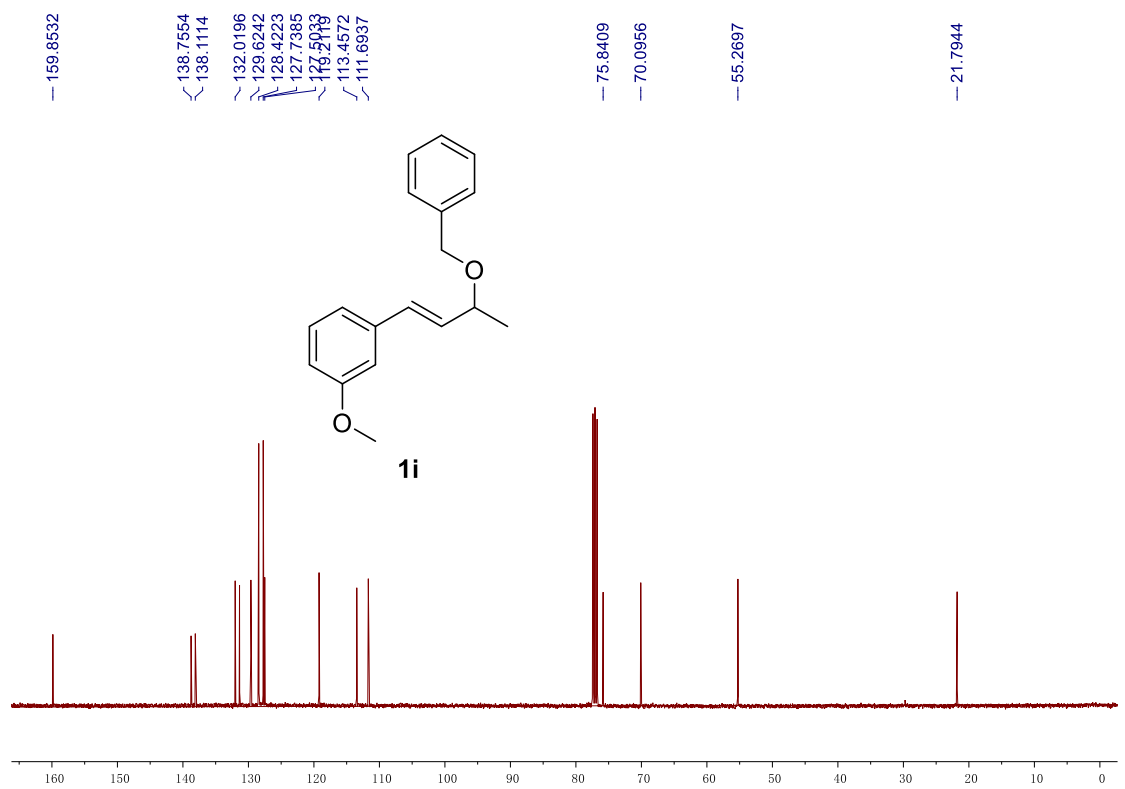

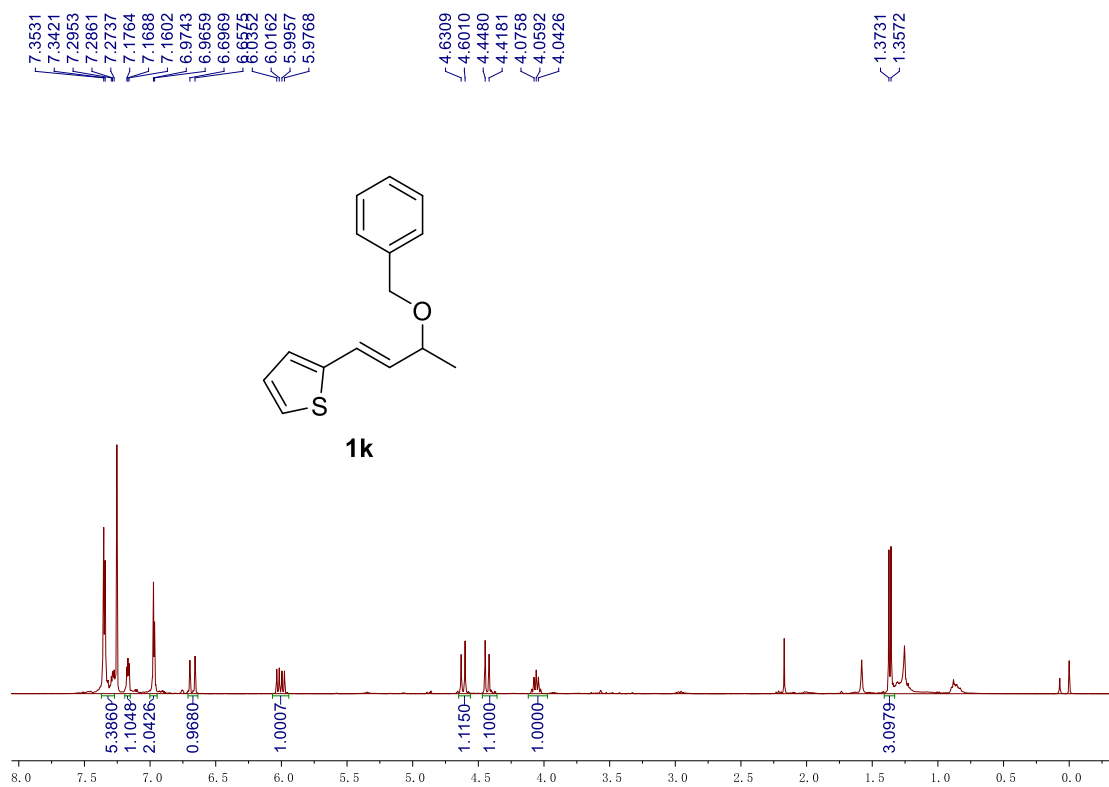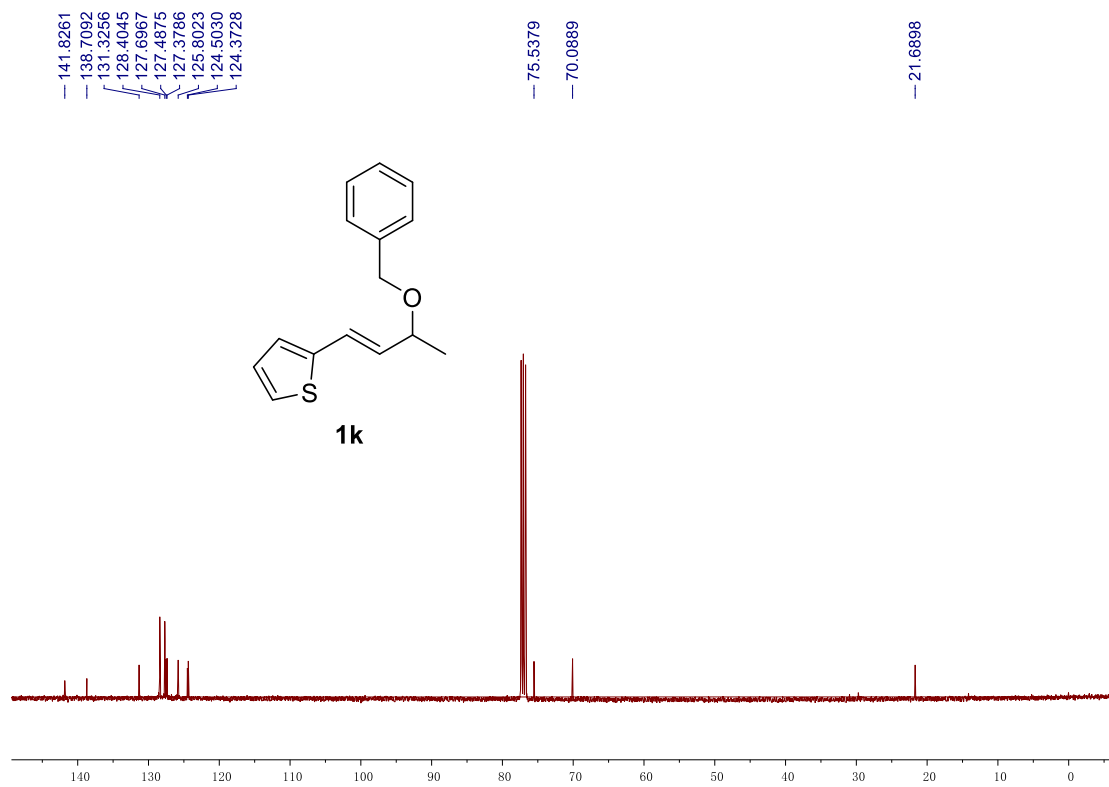

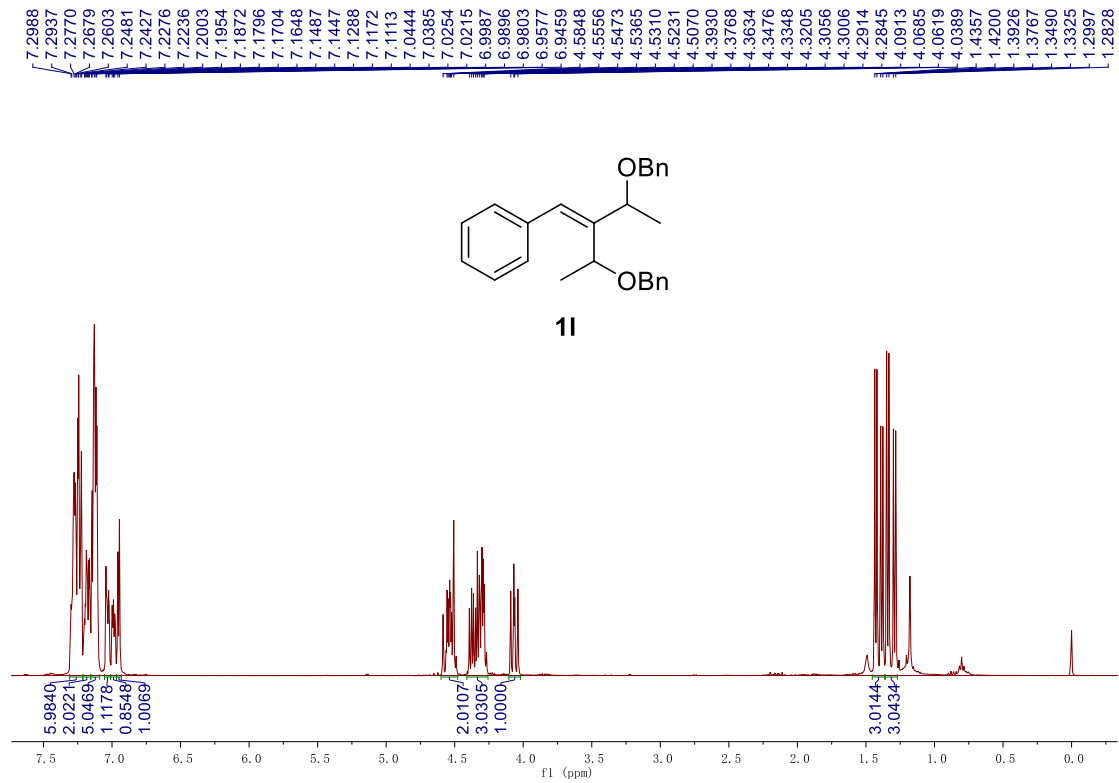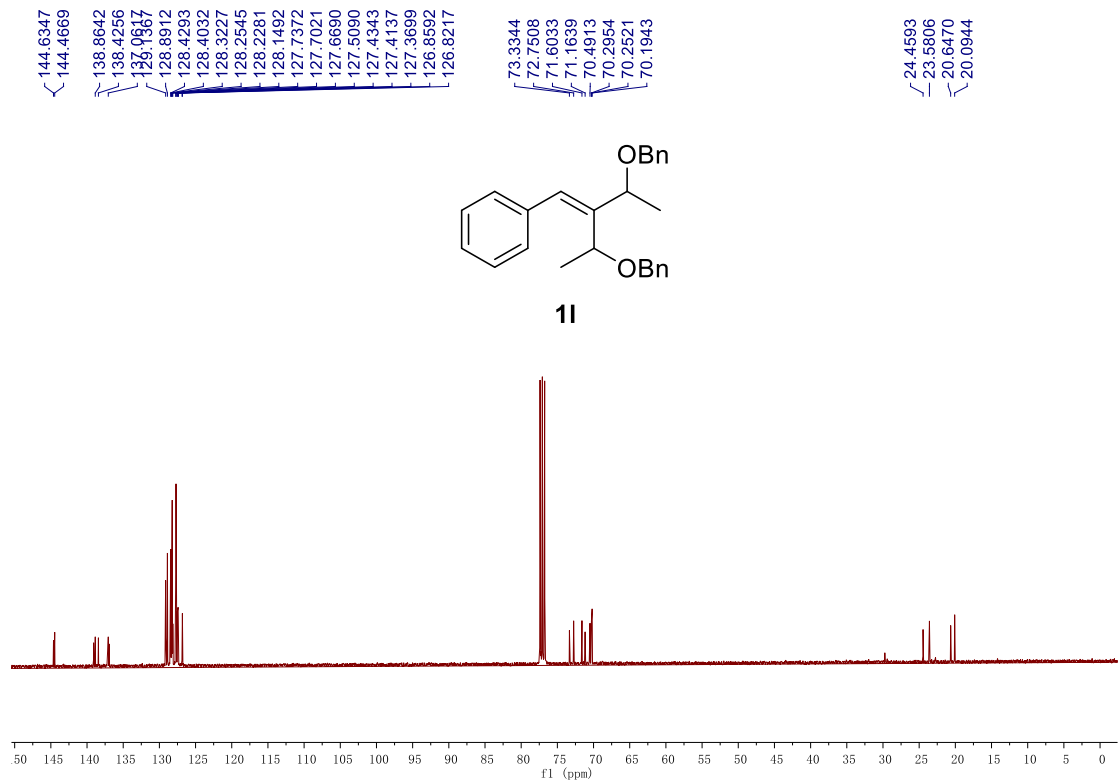

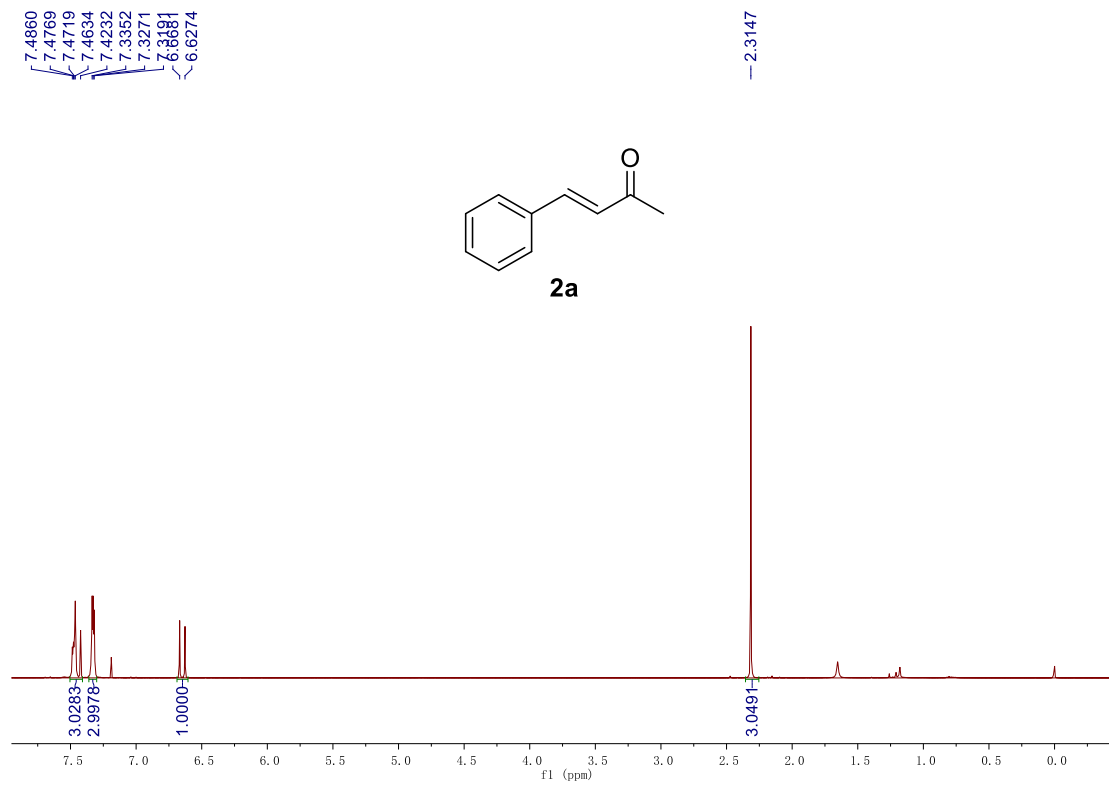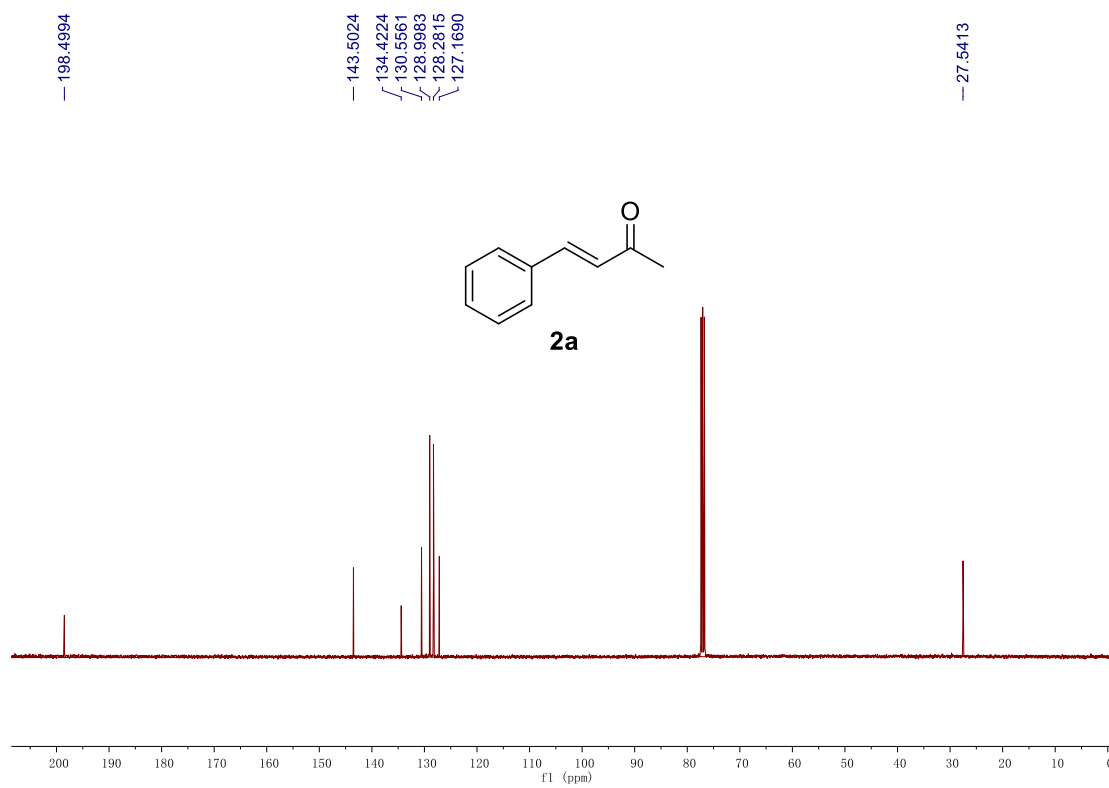

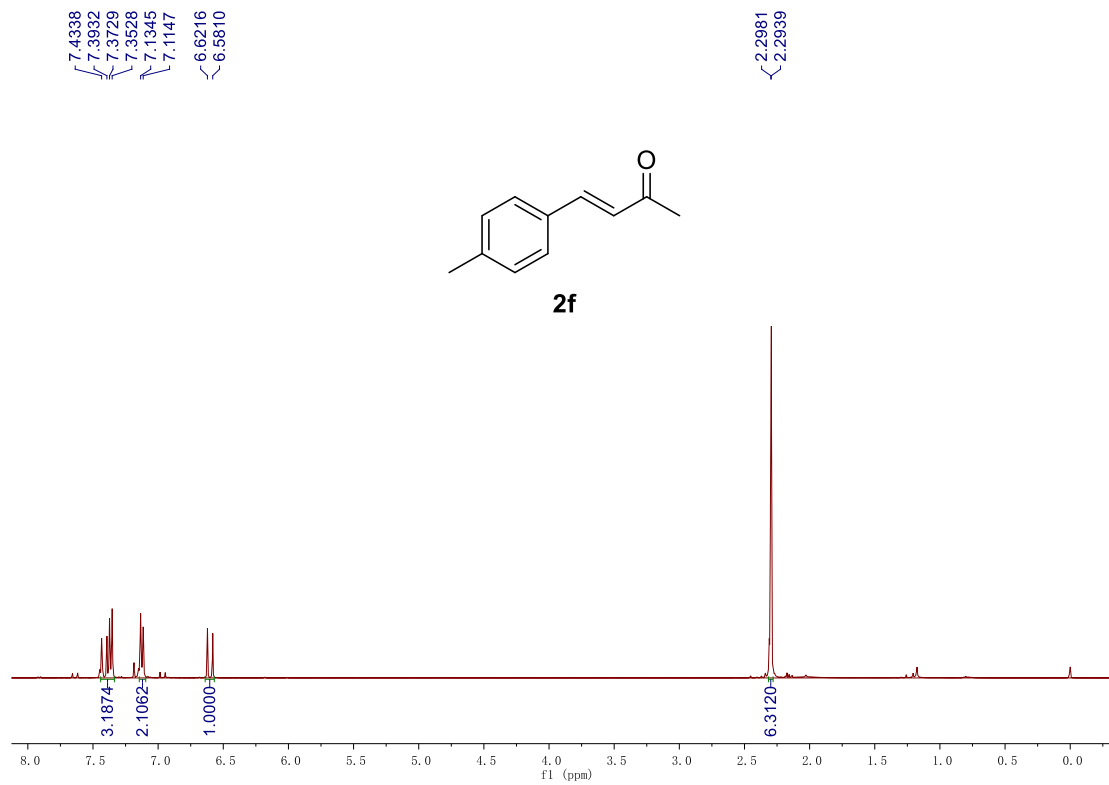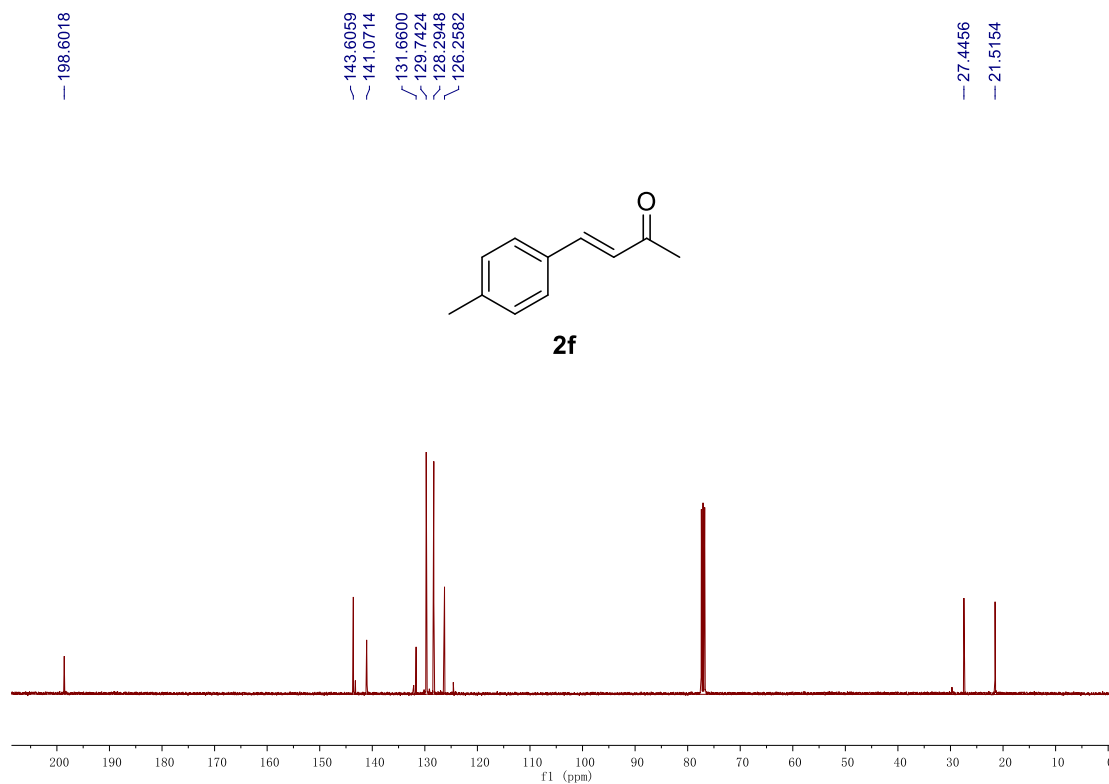

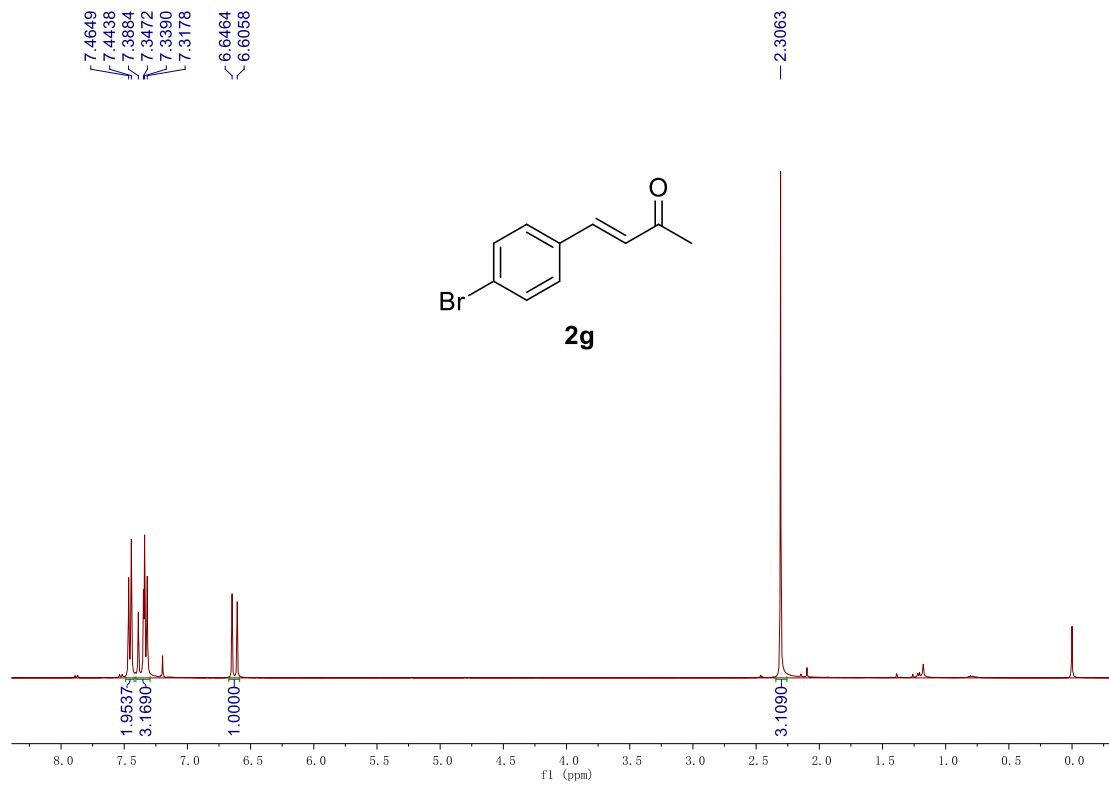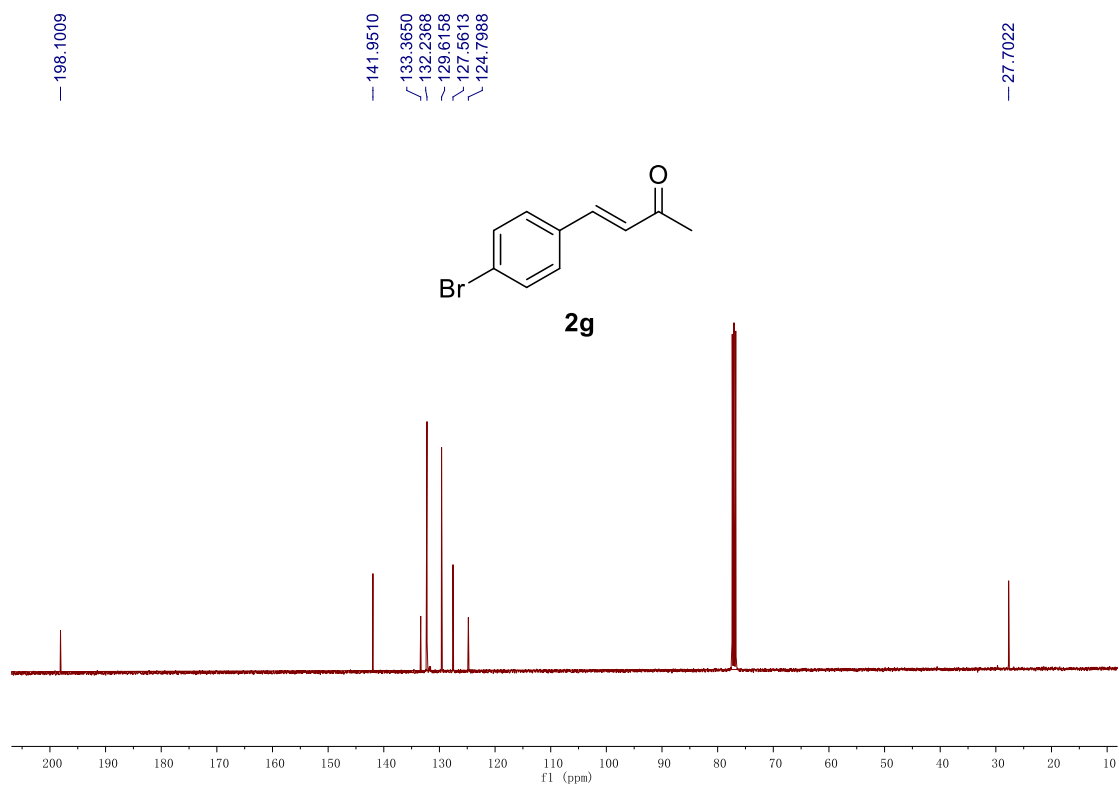

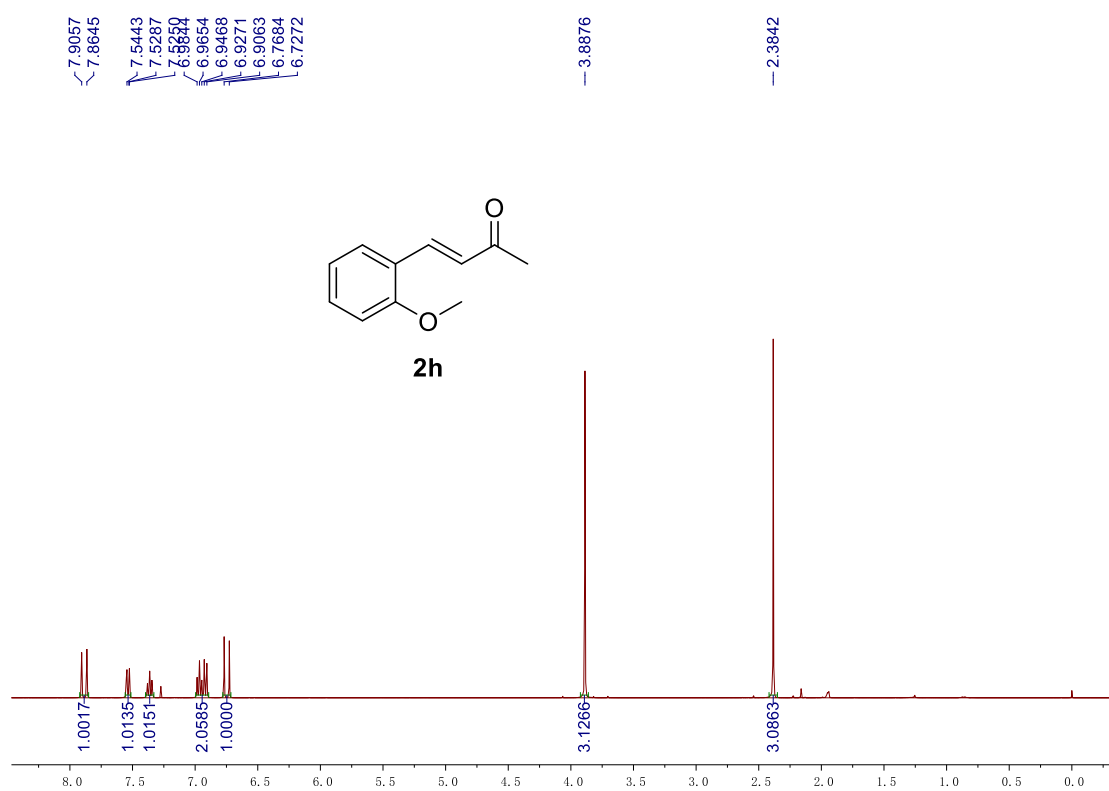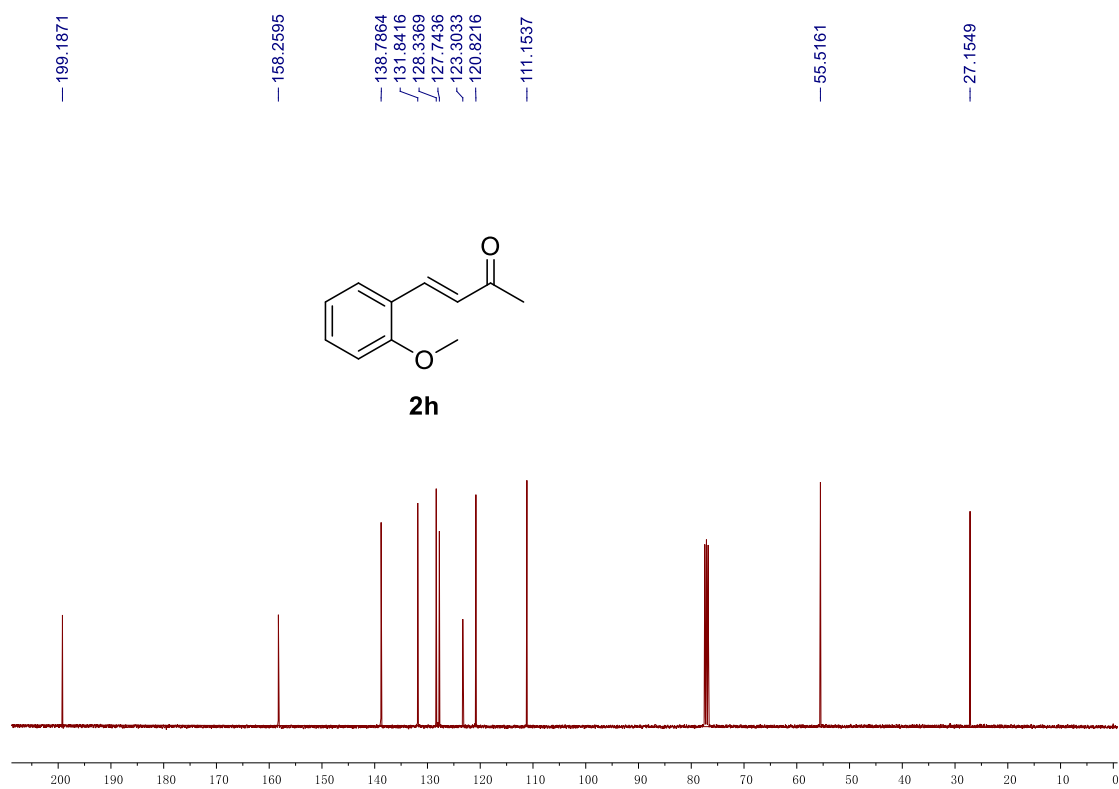

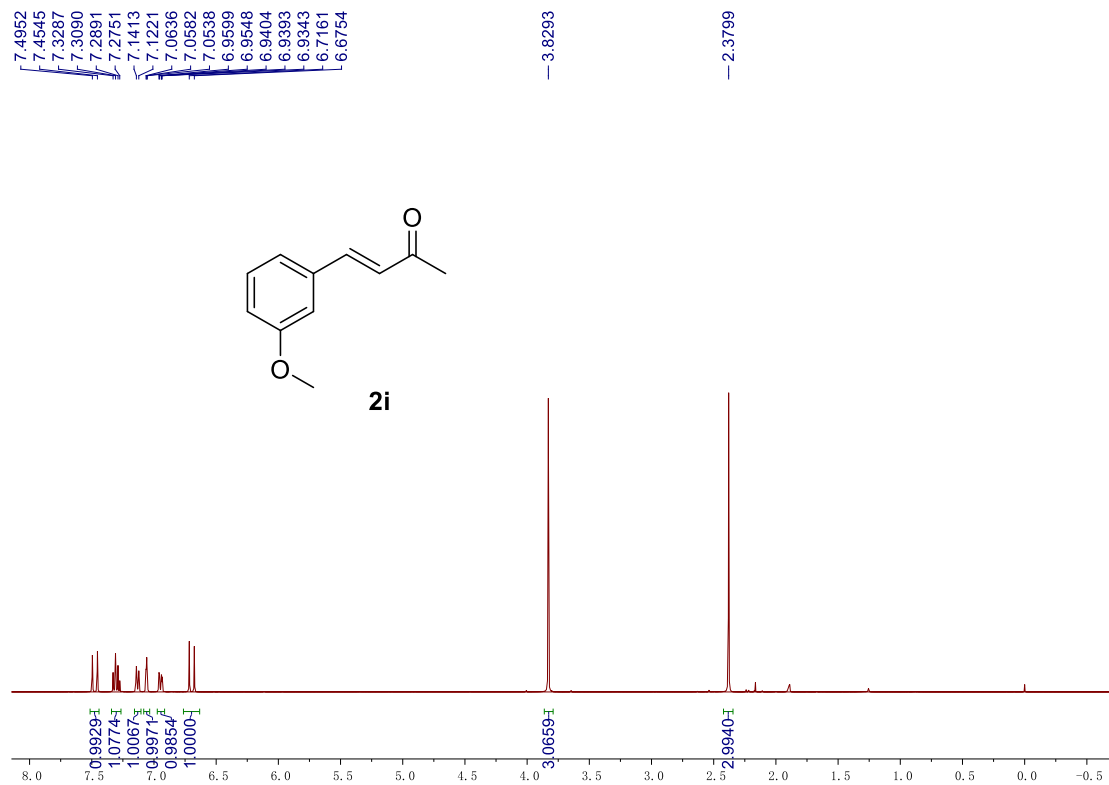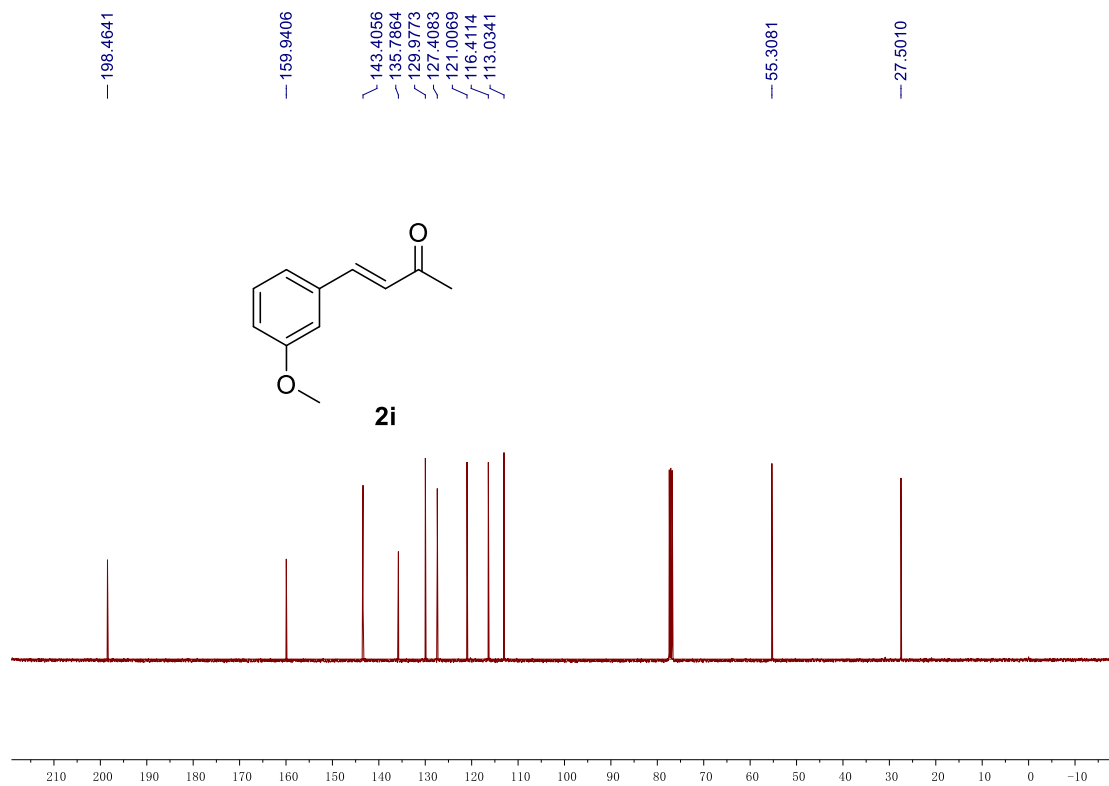



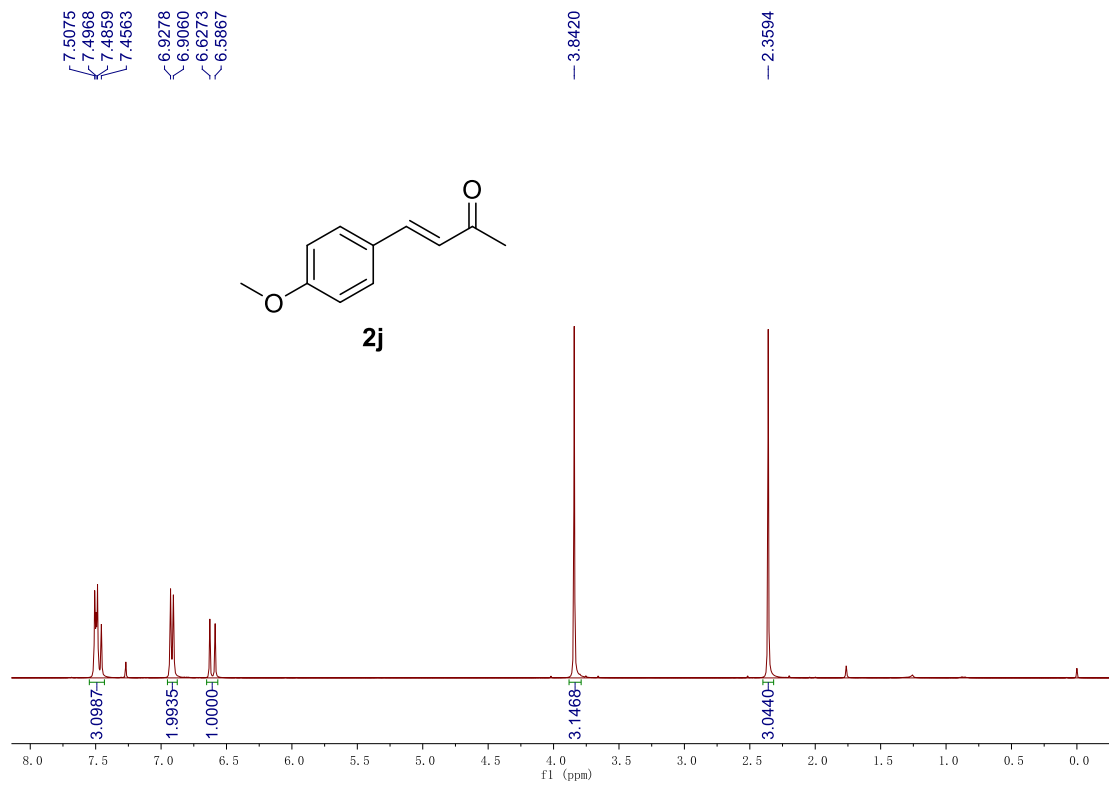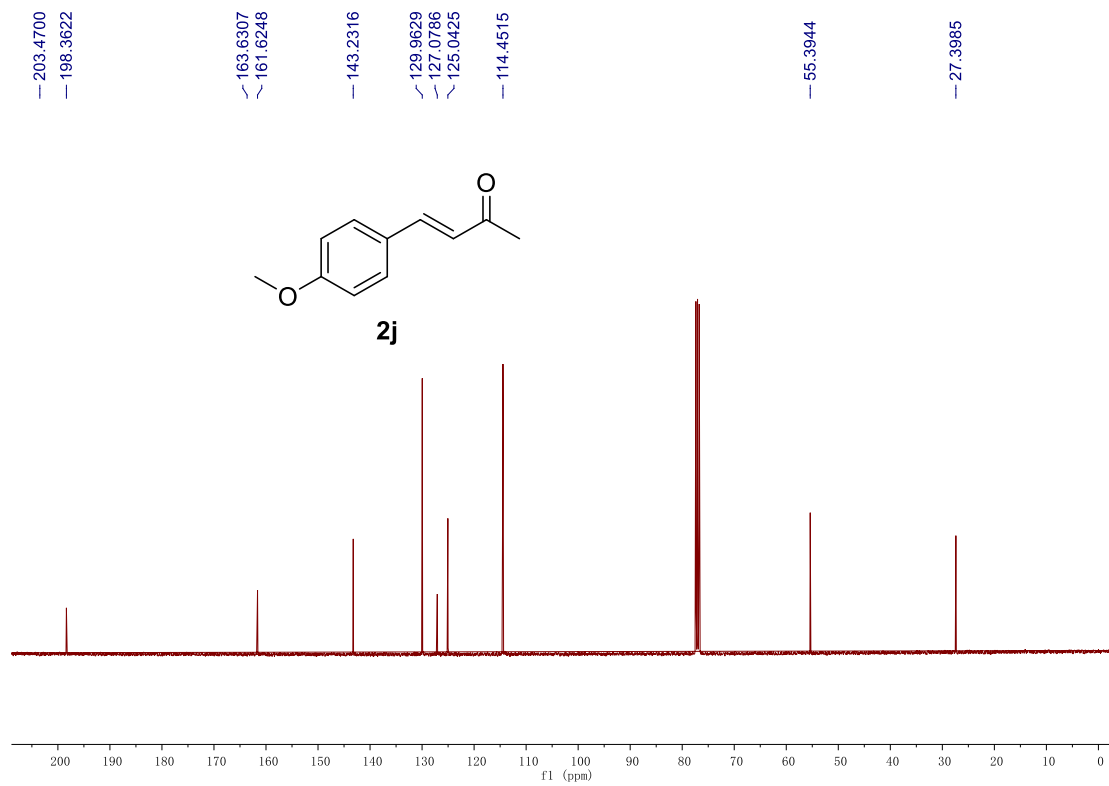

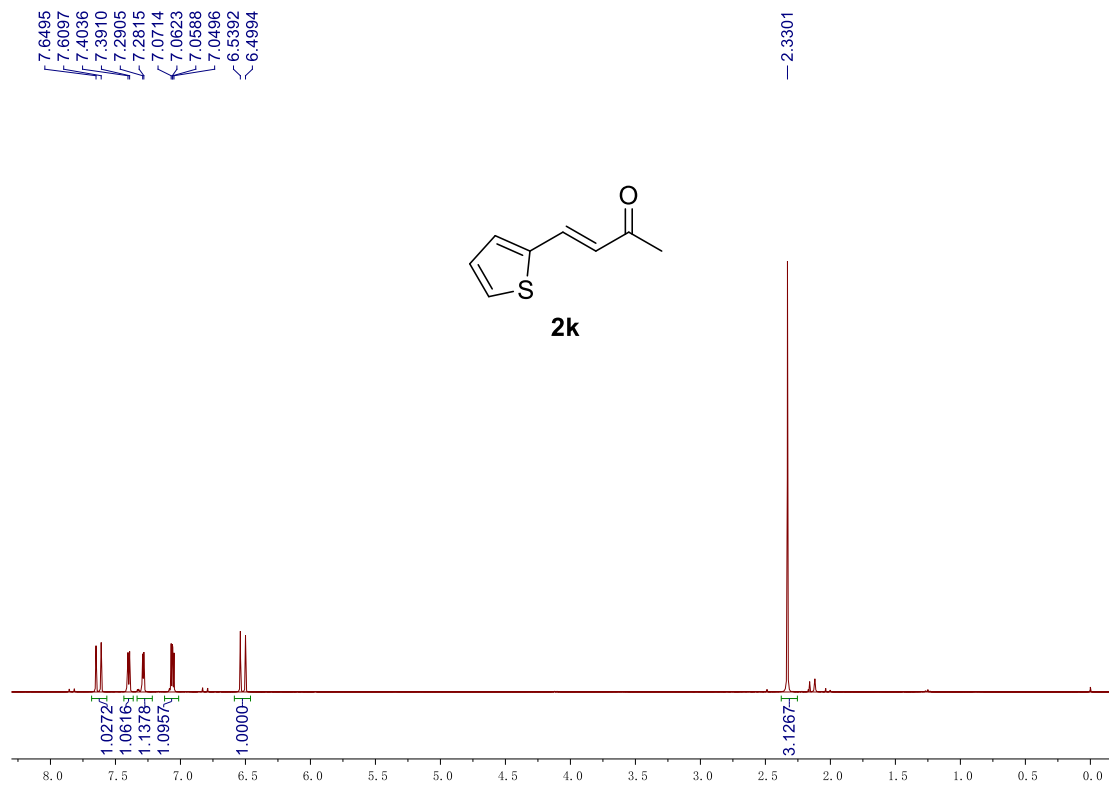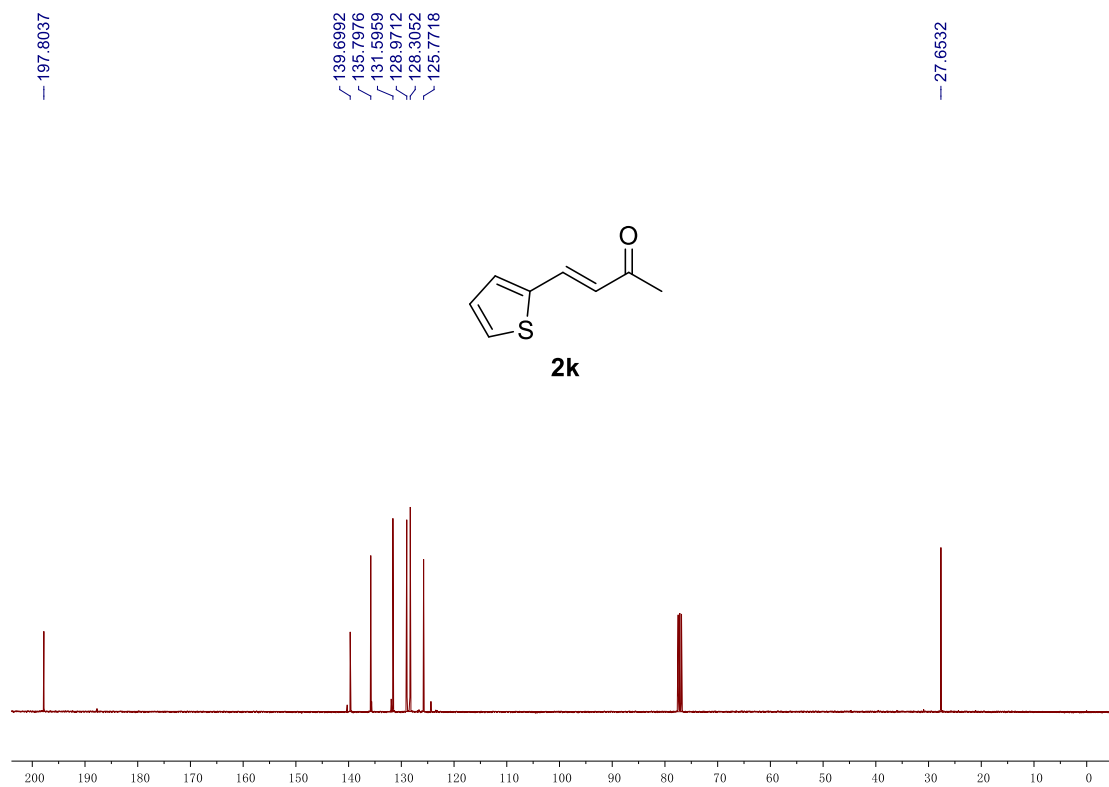

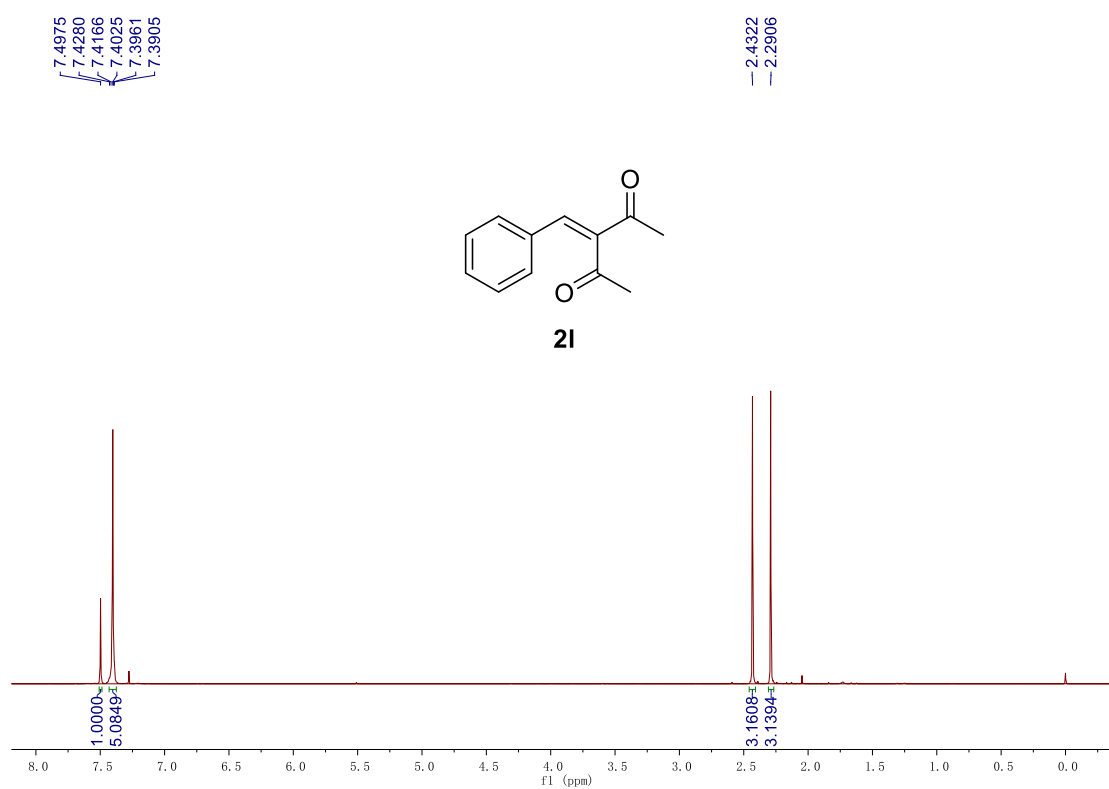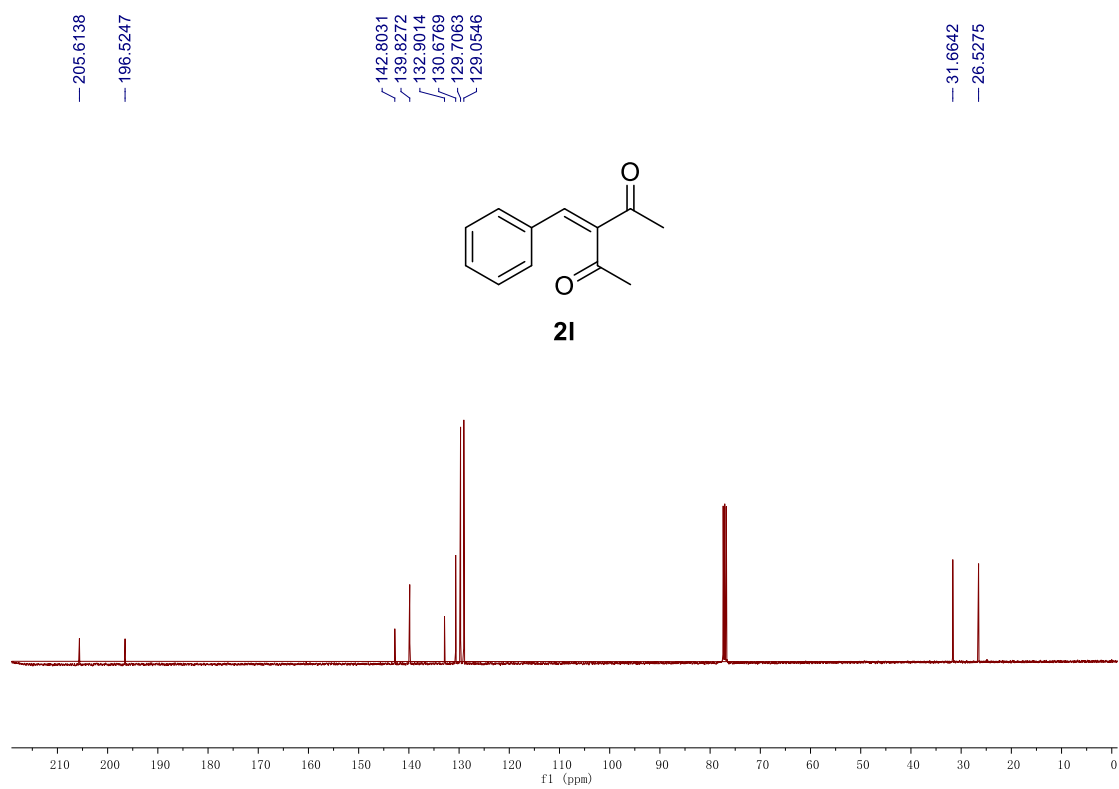

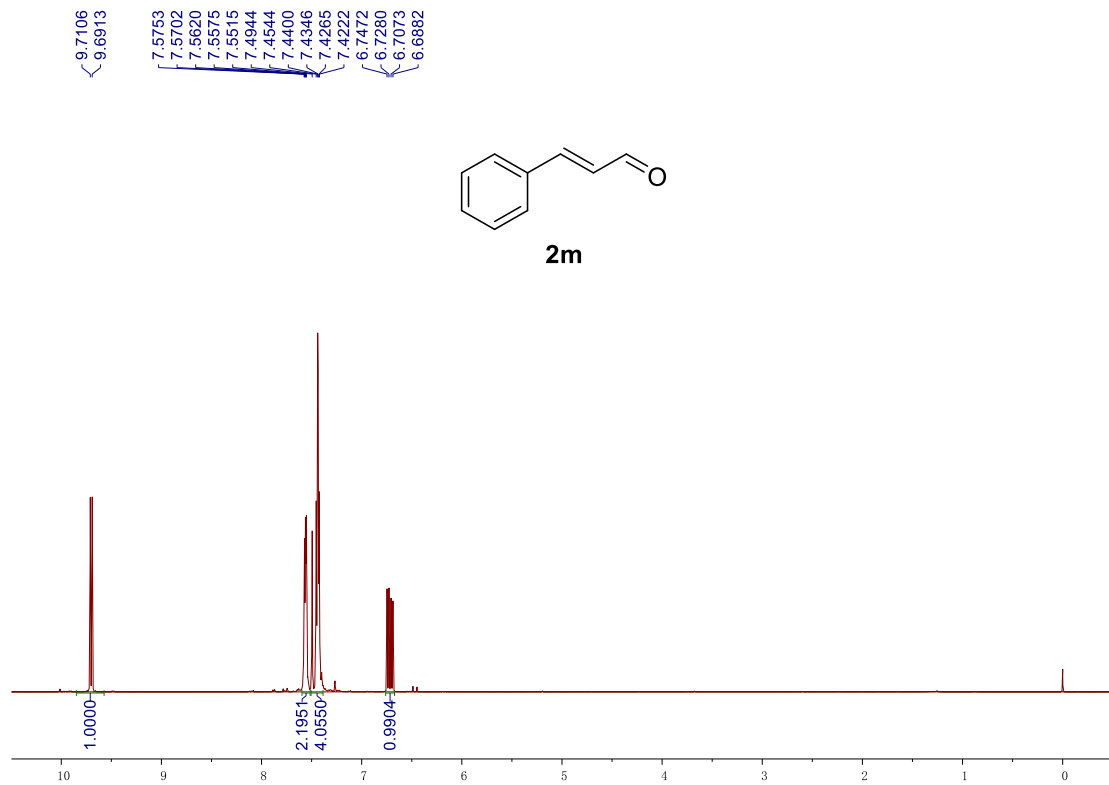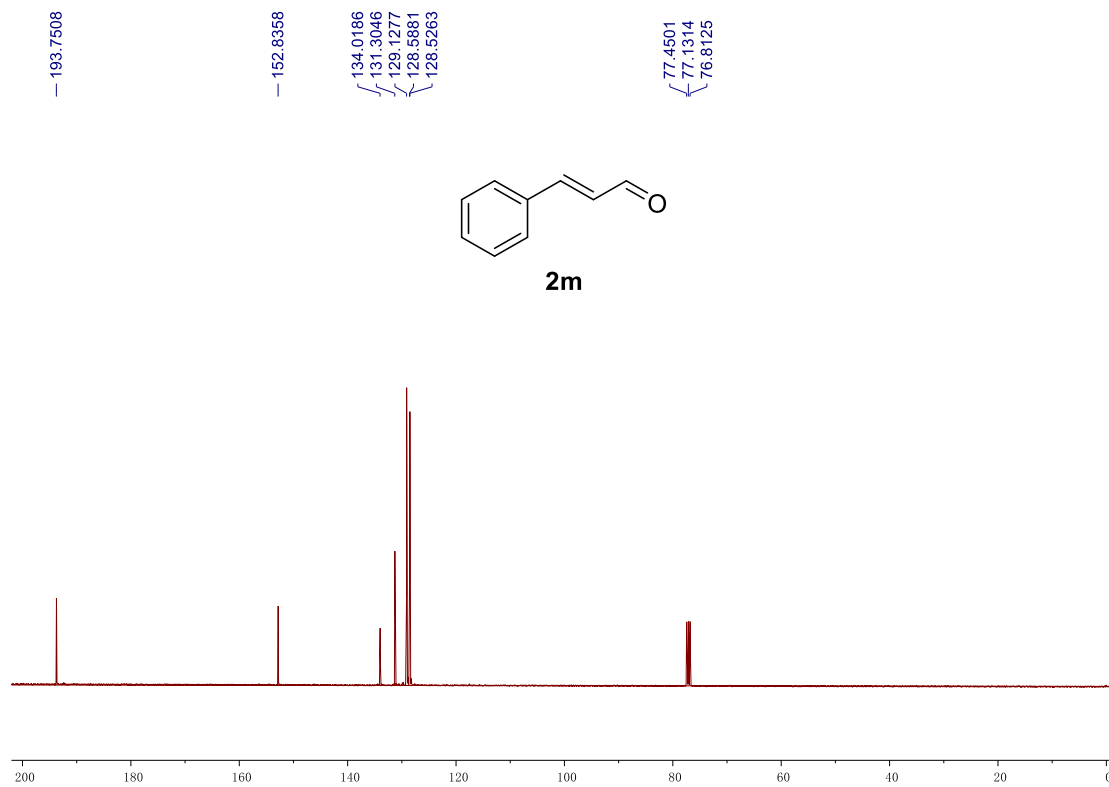

7.9609  
7.9431  
7.9399  
7.7641  
7.7248  
7.5886  
7.5801  
7.5705  
7.5658  
7.5367  
7.5183  
7.5000  
7.4851  
7.4550  
7.4457  
7.4359  
7.4178  
7.3554  
7.3473  
7.3412

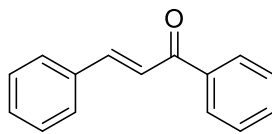

2p

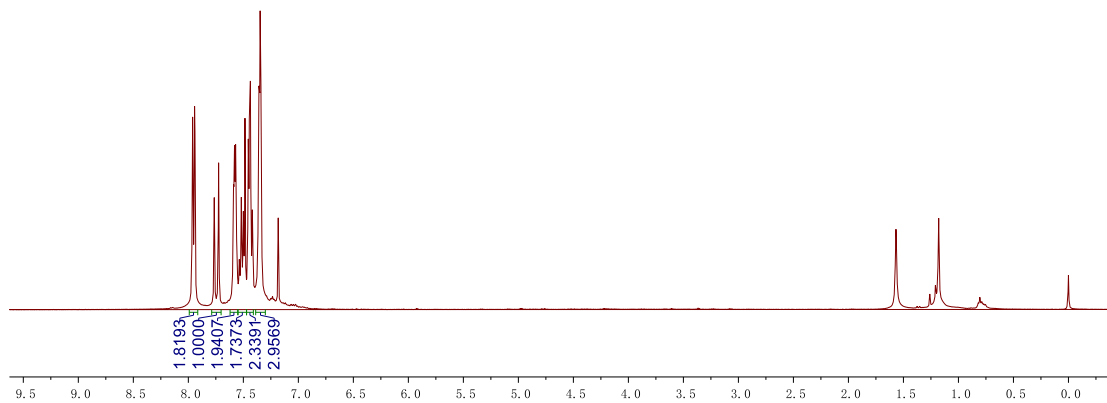

190.5649

144.8671  
138.2717  
134.9446  
132.7913  
130.5566  
128.9781  
128.6419  
128.5207  
128.4616  
122.1449

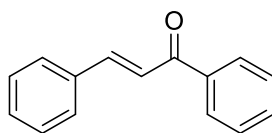

2p

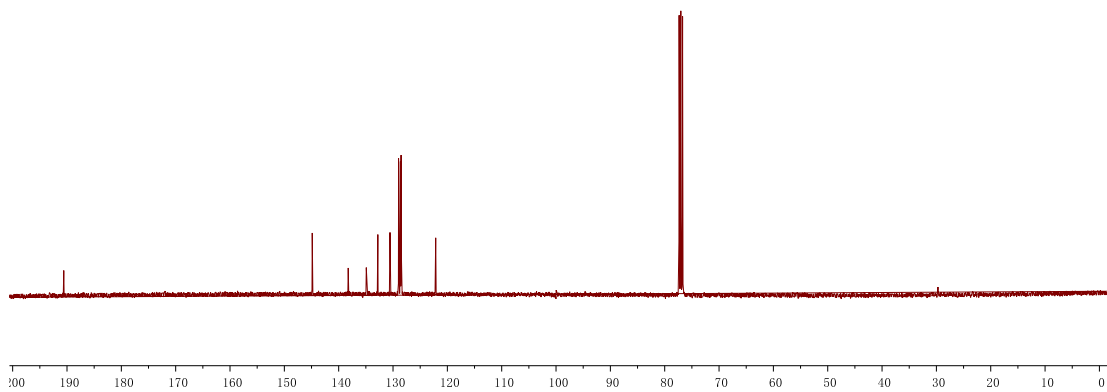

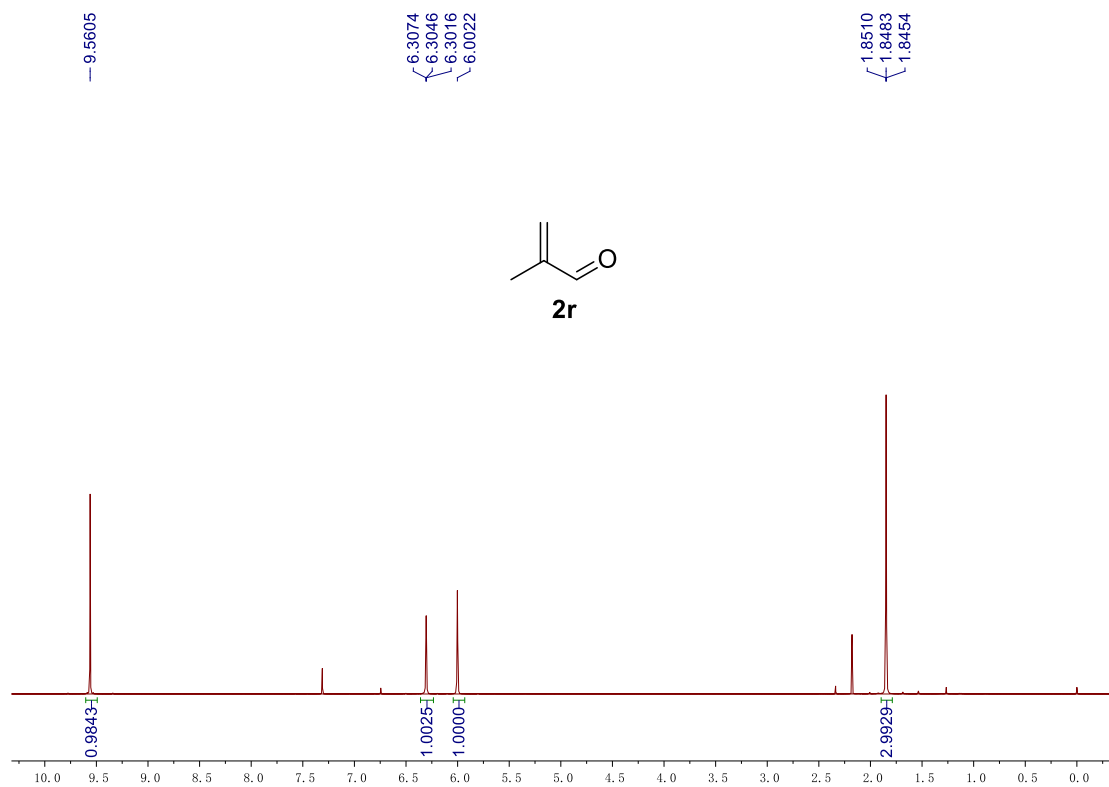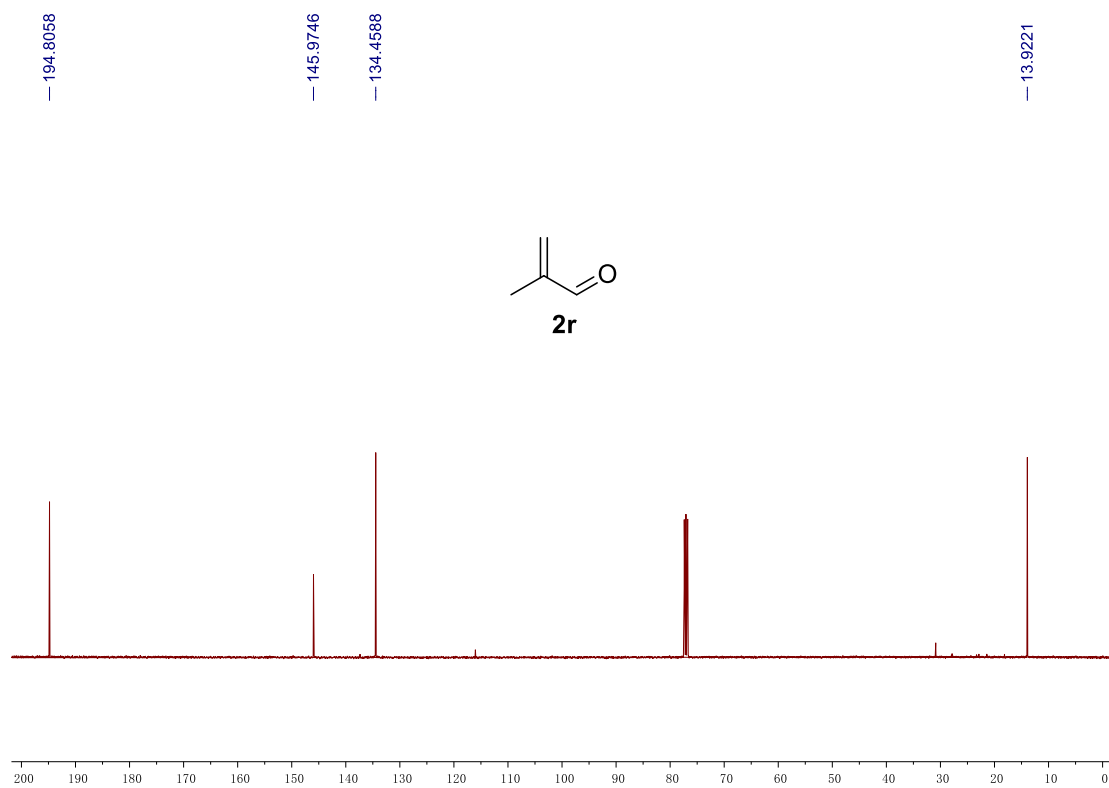

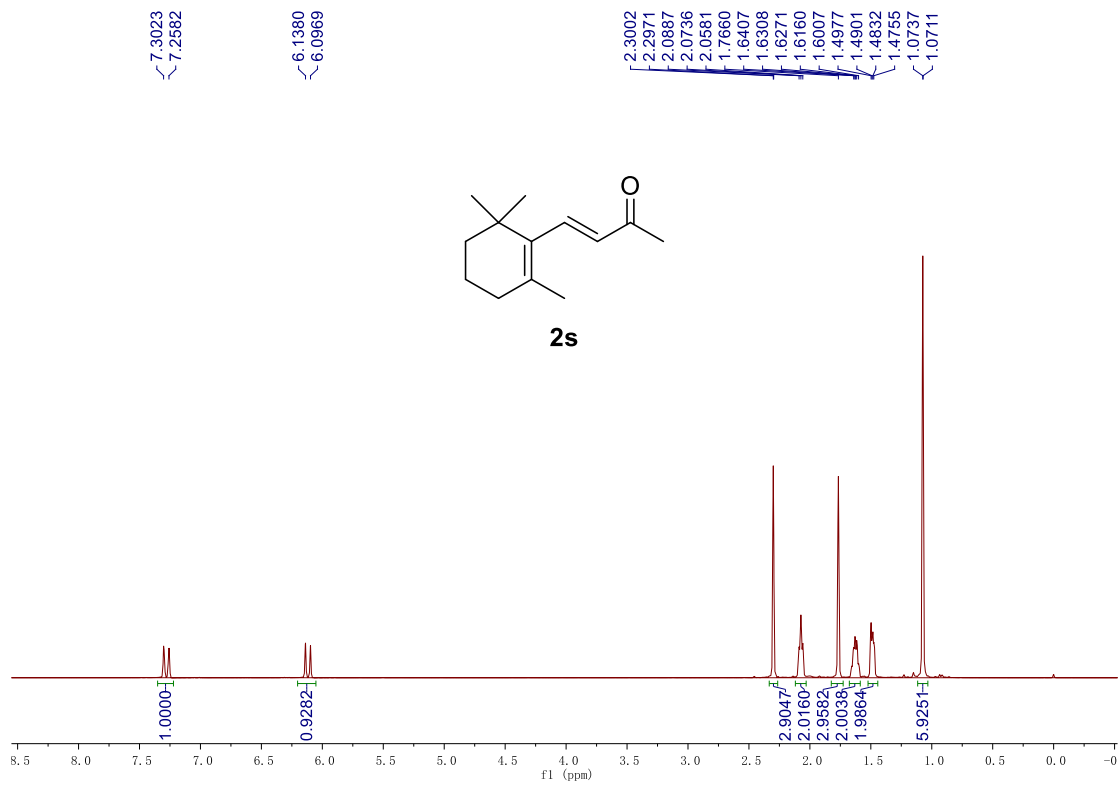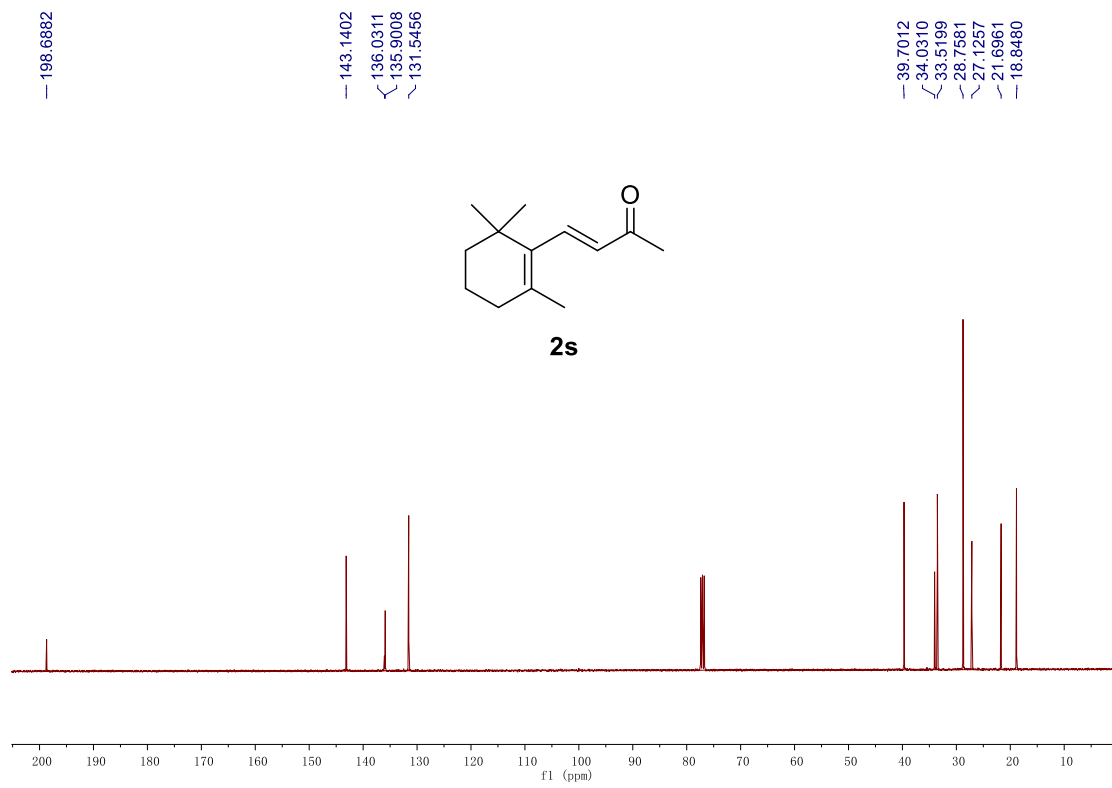

Supplement: d0ra02625e1.pdf [file d0ra02625e1.pdf]
